# Supplementary material for: Chromosomal-level assembly of the blood clam, Scapharca (Anadara) broughtonii, using long sequence reads and Hi-C
Source: PubMed Central journal article supplement (PMC6615981; doi:10.1093/gigascience/giz067), 2019-07-09
Supplement: giz067_giga-d-19-00008_original_submission.pdf [file giz067_giga-d-19-00008_original_submission.pdf]

## Chromosomal-level assembly of the bloody clam, *Scapharca (Anadara) broughtonii*, using long sequence reads and Hi-C --Manuscript Draft--

|                                                      |                                                                                                                                                                                                                                                                                                                                                                                                                                                                                                                                                                                                                                                                                                                                                                                                                                                                                                                                                                                                                                                                                                                                                                                                                                                                                                                                                                                                                                                                                                |                       |
|------------------------------------------------------|------------------------------------------------------------------------------------------------------------------------------------------------------------------------------------------------------------------------------------------------------------------------------------------------------------------------------------------------------------------------------------------------------------------------------------------------------------------------------------------------------------------------------------------------------------------------------------------------------------------------------------------------------------------------------------------------------------------------------------------------------------------------------------------------------------------------------------------------------------------------------------------------------------------------------------------------------------------------------------------------------------------------------------------------------------------------------------------------------------------------------------------------------------------------------------------------------------------------------------------------------------------------------------------------------------------------------------------------------------------------------------------------------------------------------------------------------------------------------------------------|-----------------------|
| <b>Manuscript Number:</b>                            | GIGA-D-19-00008                                                                                                                                                                                                                                                                                                                                                                                                                                                                                                                                                                                                                                                                                                                                                                                                                                                                                                                                                                                                                                                                                                                                                                                                                                                                                                                                                                                                                                                                                |                       |
| <b>Full Title:</b>                                   | Chromosomal-level assembly of the bloody clam, <i>Scapharca (Anadara) broughtonii</i> , using long sequence reads and Hi-C                                                                                                                                                                                                                                                                                                                                                                                                                                                                                                                                                                                                                                                                                                                                                                                                                                                                                                                                                                                                                                                                                                                                                                                                                                                                                                                                                                     |                       |
| <b>Article Type:</b>                                 | Data Note                                                                                                                                                                                                                                                                                                                                                                                                                                                                                                                                                                                                                                                                                                                                                                                                                                                                                                                                                                                                                                                                                                                                                                                                                                                                                                                                                                                                                                                                                      |                       |
| <b>Funding Information:</b>                          | National Key R&D Program of China (2018YFD0900304)                                                                                                                                                                                                                                                                                                                                                                                                                                                                                                                                                                                                                                                                                                                                                                                                                                                                                                                                                                                                                                                                                                                                                                                                                                                                                                                                                                                                                                             | Dr. Biao Wu           |
|                                                      | China Agriculture Research System (CARS-49)                                                                                                                                                                                                                                                                                                                                                                                                                                                                                                                                                                                                                                                                                                                                                                                                                                                                                                                                                                                                                                                                                                                                                                                                                                                                                                                                                                                                                                                    | Prof. Chong-Ming Wang |
|                                                      | National Natural Science Foundation of China (31602142)                                                                                                                                                                                                                                                                                                                                                                                                                                                                                                                                                                                                                                                                                                                                                                                                                                                                                                                                                                                                                                                                                                                                                                                                                                                                                                                                                                                                                                        | Dr. Biao Wu           |
|                                                      | National Natural Science Foundation of China (31502208)                                                                                                                                                                                                                                                                                                                                                                                                                                                                                                                                                                                                                                                                                                                                                                                                                                                                                                                                                                                                                                                                                                                                                                                                                                                                                                                                                                                                                                        | Dr. Chang-Ming Bai    |
| <b>Abstract:</b>                                     | <p><b>Background:</b> The bloody clam, <i>Scapharca (Anadara) broughtonii</i>, is an economically and ecologically important marine bivalve of the Family Arcidae. Many efforts have been made to study their population genetics, breeding, cultivation and stock enrichment. However, the lack of a reference genome has hindered these researches. Here, we reported the complete genome sequence of <i>S. broughtonii</i>, a first reference genome of the Family Arcidae.</p> <p><b>Funding:</b> A total of 75.79 Gb clean data of long reads was generated with the PacBio and Oxford Nanopore platforms, which represented approx. 86× coverage of the bloody clam genome. De novo assembly of the long reads generated an 884.5 Mb genome of the bloody clam with a contig N50 of 1.80 Mb and scaffold N50 of 45.00 Mb, respectively. Hi-C scaffolding of the genome resulted in 19 chromosomes containing 99.35% bases of the assembled genome. Genome annotation revealed that a considerable part of the genome (46.1%) is composed by repeated sequences. Gene prediction identified 24,045 protein-coding genes, and 84.7% of them were annotated in at least one database.</p> <p><b>Conclusion:</b> We report here the chromosomal-level assembly of the bloody clam with long sequence reads and Hi-C scaffolding. The genomic data could be served as reference genome and provide a valuable resource for various studies related to genomic information of bloody clam.</p> |                       |
| <b>Corresponding Author:</b>                         | Chong-Ming Wang<br>YSFRI<br>Qingdao, Shandong CHINA                                                                                                                                                                                                                                                                                                                                                                                                                                                                                                                                                                                                                                                                                                                                                                                                                                                                                                                                                                                                                                                                                                                                                                                                                                                                                                                                                                                                                                            |                       |
| <b>Corresponding Author Secondary Information:</b>   |                                                                                                                                                                                                                                                                                                                                                                                                                                                                                                                                                                                                                                                                                                                                                                                                                                                                                                                                                                                                                                                                                                                                                                                                                                                                                                                                                                                                                                                                                                |                       |
| <b>Corresponding Author's Institution:</b>           | YSFRI                                                                                                                                                                                                                                                                                                                                                                                                                                                                                                                                                                                                                                                                                                                                                                                                                                                                                                                                                                                                                                                                                                                                                                                                                                                                                                                                                                                                                                                                                          |                       |
| <b>Corresponding Author's Secondary Institution:</b> |                                                                                                                                                                                                                                                                                                                                                                                                                                                                                                                                                                                                                                                                                                                                                                                                                                                                                                                                                                                                                                                                                                                                                                                                                                                                                                                                                                                                                                                                                                |                       |
| <b>First Author:</b>                                 | Chang-Ming Bai, Ph.D.                                                                                                                                                                                                                                                                                                                                                                                                                                                                                                                                                                                                                                                                                                                                                                                                                                                                                                                                                                                                                                                                                                                                                                                                                                                                                                                                                                                                                                                                          |                       |
| <b>First Author Secondary Information:</b>           |                                                                                                                                                                                                                                                                                                                                                                                                                                                                                                                                                                                                                                                                                                                                                                                                                                                                                                                                                                                                                                                                                                                                                                                                                                                                                                                                                                                                                                                                                                |                       |
| <b>Order of Authors:</b>                             | Chang-Ming Bai, Ph.D.                                                                                                                                                                                                                                                                                                                                                                                                                                                                                                                                                                                                                                                                                                                                                                                                                                                                                                                                                                                                                                                                                                                                                                                                                                                                                                                                                                                                                                                                          |                       |
|                                                      | Lu-Sheng Xin                                                                                                                                                                                                                                                                                                                                                                                                                                                                                                                                                                                                                                                                                                                                                                                                                                                                                                                                                                                                                                                                                                                                                                                                                                                                                                                                                                                                                                                                                   |                       |
|                                                      | Umberto Rosani                                                                                                                                                                                                                                                                                                                                                                                                                                                                                                                                                                                                                                                                                                                                                                                                                                                                                                                                                                                                                                                                                                                                                                                                                                                                                                                                                                                                                                                                                 |                       |
|                                                      | Biao Wu                                                                                                                                                                                                                                                                                                                                                                                                                                                                                                                                                                                                                                                                                                                                                                                                                                                                                                                                                                                                                                                                                                                                                                                                                                                                                                                                                                                                                                                                                        |                       |
|                                                      | Qing-Chen Wang                                                                                                                                                                                                                                                                                                                                                                                                                                                                                                                                                                                                                                                                                                                                                                                                                                                                                                                                                                                                                                                                                                                                                                                                                                                                                                                                                                                                                                                                                 |                       |

|                                                                                                                                                                                                                                                                                                                                                                                                                                                                                                                                     |                 |
|-------------------------------------------------------------------------------------------------------------------------------------------------------------------------------------------------------------------------------------------------------------------------------------------------------------------------------------------------------------------------------------------------------------------------------------------------------------------------------------------------------------------------------------|-----------------|
|                                                                                                                                                                                                                                                                                                                                                                                                                                                                                                                                     | Xiao-Ke Duan    |
|                                                                                                                                                                                                                                                                                                                                                                                                                                                                                                                                     | Zhi-Hong Liu    |
|                                                                                                                                                                                                                                                                                                                                                                                                                                                                                                                                     | Chong-Ming Wang |
| <b>Order of Authors Secondary Information:</b>                                                                                                                                                                                                                                                                                                                                                                                                                                                                                      |                 |
| <b>Additional Information:</b>                                                                                                                                                                                                                                                                                                                                                                                                                                                                                                      |                 |
| <b>Question</b>                                                                                                                                                                                                                                                                                                                                                                                                                                                                                                                     | <b>Response</b> |
| Are you submitting this manuscript to a special series or article collection?                                                                                                                                                                                                                                                                                                                                                                                                                                                       | No              |
| <p><b>Experimental design and statistics</b></p> <p>Full details of the experimental design and statistical methods used should be given in the Methods section, as detailed in our <a href="#">Minimum Standards Reporting Checklist</a>. Information essential to interpreting the data presented should be made available in the figure legends.</p> <p>Have you included all the information requested in your manuscript?</p>                                                                                                  | Yes             |
| <p><b>Resources</b></p> <p>A description of all resources used, including antibodies, cell lines, animals and software tools, with enough information to allow them to be uniquely identified, should be included in the Methods section. Authors are strongly encouraged to cite <a href="#">Research Resource Identifiers</a> (RRIDs) for antibodies, model organisms and tools, where possible.</p> <p>Have you included the information requested as detailed in our <a href="#">Minimum Standards Reporting Checklist</a>?</p> | Yes             |
| <p><b>Availability of data and materials</b></p> <p>All datasets and code on which the conclusions of the paper rely must be either included in your submission or deposited in <a href="#">publicly available repositories</a> (where available and ethically</p>                                                                                                                                                                                                                                                                  | Yes             |

appropriate), referencing such data using a unique identifier in the references and in the “Availability of Data and Materials” section of your manuscript.

Have you have met the above requirement as detailed in our [Minimum Standards Reporting Checklist](#)?

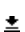

[Click here to view linked References](#)

1  
2  
3  
4  
5  
6  
7  
8  
9  
10  
11  
12  
13  
14  
15  
16  
17  
18  
19  
20  
21  
22  
23  
24  
25  
26  
27  
28  
29  
30  
31  
32  
33  
34  
35  
36  
37  
38  
39  
40  
41  
42  
43  
44  
45  
46  
47  
48  
49  
50  
51  
52  
53  
54  
55  
56  
57  
58  
59  
60  
61  
62  
63  
64  
65

1 **Chromosomal-level assembly of the bloody clam, *Scapharca (Anadara) broughtonii*, using long**  
2 **sequence reads and Hi-C**

3  
4 Chang-Ming Bai<sup>a†</sup>, Lu-Sheng Xin<sup>a†</sup>, Umberto Rosani<sup>b</sup>, Biao Wu<sup>a</sup>, Qing-Chen Wang<sup>a</sup>, Xiao-Ke Duan<sup>c</sup>,  
5 Zhi-Hong Liu<sup>a</sup>, Chong-Ming Wang<sup>a\*</sup>

6  
7 <sup>a</sup> *Key Laboratory of Maricultural Organism Disease Control, Ministry of Agriculture; Laboratory for Marine*  
8 *Fisheries Science and Food Production Processes, Qingdao National Laboratory for Marine Science and*  
9 *Technology; Qingdao Key Laboratory of Mariculture Epidemiology and Biosecurity; Yellow Sea Fisheries*  
10 *Research Institute, Chinese Academy of Fishery Sciences, Qingdao 266071, China*

11 <sup>b</sup> *Department of Biology, University of Padua, Padua 35121, Italy*

12 <sup>c</sup> *Biomarker Technologies Corporation, Beijing 101200, China*

13  
14 † These authors contributed equally to this work.

15 \* Correspondence to: Chong-Ming Wang, E-mail address: [wangcm@ysfri.ac.cn](mailto:wangcm@ysfri.ac.cn).

1  
2  
3  
4  
5  
6  
7  
8  
9  
10  
11  
12  
13  
14  
15  
16  
17  
18  
19  
20  
21  
22  
23  
24  
25  
26  
27  
28  
29  
30  
31  
32  
33  
34  
35  
36  
37  
38  
39  
40  
41  
42  
43  
44  
45  
46  
47  
48  
49  
50  
51  
52  
53  
54  
55  
56  
57  
58  
59  
60  
61  
62  
63  
64  
65

17 **Abstract**

18 **Background:** The bloody clam, *Scapharca (Anadara) broughtonii*, is an economically and ecologically  
19 important marine bivalve of the Family Arcidae. Many efforts have been made to study their  
20 population genetics, breeding, cultivation and stock enrichment. However, the lack of a reference  
21 genome has hindered these researches. Here, we reported the complete genome sequence of *S.*  
22 *broughtonii*, a first reference genome of the Family Arcidae.

23 **Funding:** A total of 75.79 Gb clean data of long reads was generated with the PacBio and Oxford  
24 Nanopore platforms, which represented approx. 86× coverage of the bloody clam genome. *De novo*  
25 assembly of the long reads generated an 884.5 Mb genome of the bloody clam with a contig N50 of  
26 1.80 Mb and scaffold N50 of 45.00 Mb, respectively. Hi-C scaffolding of the genome resulted in 19  
27 chromosomes containing 99.35% bases of the assembled genome. Genome annotation revealed that a  
28 considerable part of the genome (46.1%) is composed by repeated sequences. Gene prediction  
29 identified 24,045 protein-coding genes, and 84.7% of them were annotated in at least one database.

30 **Conclusion:** We report here the chromosomal-level assembly of the bloody clam with long sequence  
31 reads and Hi-C scaffolding. The genomic data could be served as reference genome and provide a  
32 valuable resource for various studies related to genomic information of bloody clam.

34 *Keywords:* bloody calm; PacBio; Hi-C; genomic; chromosomal assembly.

1  
2  
3  
4  
5  
6  
7  
8  
9  
10  
11  
12  
13  
14  
15  
16  
17  
18  
19  
20  
21  
22  
23  
24  
25  
26  
27  
28  
29  
30  
31  
32  
33  
34  
35  
36  
37  
38  
39  
40  
41  
42  
43  
44  
45  
46  
47  
48  
49  
50  
51  
52  
53  
54  
55  
56  
57  
58  
59  
60  
61  
62  
63  
64  
65

37 **Background information**

38 The bloody clam, *Scapharca (Anadara) broughtonii* (Schrenck, 1867), also known as ark shell, belongs to  
39 the Family Arcidae, Class Pteriomorpha, Phylum Mollusca. Approx. 200 species are found in this  
40 family, most of them distributed in tropical areas [1]. Differently, the bloody clam lived in temperate  
41 areas along the coasts of northern China, Japan, Korea and the Russian Far East [1, 2]. The name  
42 “bloody clam” originated from the red color of their visceral mass due to the presence of hemoglobin  
43 in both tissues and hemolymph [1, 2]. Containing hemoglobin is not typical of mollusk, and one of  
44 the most interesting points of Family Arcidae. Bloody clam has thick and harder calcareous shells  
45 and is relatively large in size, which could grow to 100 mm in shell length [3]. The shells are always  
46 covered by hairy periostracum colored in brown [2]. Served as a source of sashimi, the wild bloody  
47 clam resource had been overused to depletion in the last century. Many efforts have been made to  
48 recover the wild population of bloody clam in China, Japan and Korea. Many research and  
49 production process involved the cultivation of them in high density, and rendered them to  
50 pathogenic bacterial and virus [1, 4-6]. Compared to oysters and scallops, we still knew very little  
51 about the basic biology and cultivation of bloody clam and little information is available regarding  
52 the genomic sequence of the bloody clam. Here, we sequenced the complete genome of the bloody  
53 clam to provide a genomic foundation for future research and culture industry development.

54 **Sample collection and sequencing**

55 To overcome the excessive polysaccharide content of bloody clam tissues, we extracted high-quality  
56 genomic DNA from haemocytes, which were collected from a batch of adults sampled from wild  
57 populations near Jimo, Shandong Province, China. The DNA was extracted using DNeasy® Blood &  
58 Tissue Kit (QIAGEN, Cat No.: 69504) with slight modification to remove polysaccharide. The DNA  
59 quality and quantity were measured with agarose gel electrophoresis and Qubit 3.0 (Invitrogen,  
60 Carlsbad, CA, USA), respectively. High-quality DNA was sent to BioMarker Technology Co. Ltd.  
61 (Beijing, China) for libraries preparation and high-throughput sequencing using PacBio, Nanopore  
62 and Illumina platforms (Table 1).  
63 PacBio sequencing was carried out with the SMRT Bell™ library using a DNA Template Prep Kit 1.0  
64 (PacBio p/n 100-259-100). Briefly, the genomic DNA (10 µg) was mechanically sheared using a  
65 Covaris g-Tube (Kbiosciences p/n 520079) to get DNA fragments of approx. 20 Kb in size. The

1  
2  
3  
4  
5 66 sheared DNA was DNA-damage repaired and end-repaired using polishing enzymes. Then a  
6  
7 67 blunt-end ligation reaction followed by exonuclease treatment was conducted to generate the SMRT  
8  
9 68 Bell™ template. Finally, large fragments (>10 Kb) were enriched with Blue Pippin device (Sage  
10  
11 69 Science, Inc., Beverly, MA, USA) for sequencing. A total of 15 SMRT cells were processed, of which 7  
12  
13 70 and 8 cells were sequenced with Sequel and RS II instruments (Pacific Biosciences, Menlo Park, CA,  
14  
15 71 USA), respectively. A total of 67.32 Gb PacBio data was generated. For Oxford Nanopore sequencing,  
16  
17 72 approx. 5 µg genomic DNA was sheared and size-selected (~20 kb) with the same procedure as  
18  
19 73 described above. The selected fragments were further processed using the Ligation Sequencing 1D  
20  
21 74 Kit (Oxford Nanopore, Oxford, UK) according to the manufacturer's instructions, and sequenced  
22  
23 75 using the MinION portable DNA sequencer with the 48 hours run script (Oxford Nanopore) for a  
24  
25 76 total of 8.47 Gb data. For Illumina sequencing, paired-end (PE) libraries with insert size of 350 bp  
26  
27 77 were constructed according to the manufacturer's protocol and sequenced with an Illumina HiSeq X  
28  
29 78 Ten platform (San Diego, CA, USA) with paired-end 150 (PE150) strategy. A total of 53.06 Gb  
30  
31 79 Illumina data was generated and used for genome survey, correction and evaluation (Supplementary  
32  
33 80 Table S1). All of the long-reads data for assembly and Illumina data for genome survey were  
34  
35 81 deposited in the NCBI SRA database under the SAMN10879241.

### 35 82 **Initial genome assembly and evaluation**

36  
37 83 The Sequel raw bam and RS II H5 files were converted into subreads in fasta format with the  
38  
39 84 standard PacBio SMRT software package. Consequently, a total of 63,330,577,481 and 3,990,849,516  
40  
41 85 bases were obtained with Sequel and RS II instruments, respectively. After subreads shorter than 500  
42  
43 86 bp in size were filtered out, we obtained a clean dataset of 4,761,097 reads with a total of  
44  
45 87 67,260,156,459 bases (Supplementary Table S2). The N50 and mean length of these subreads were  
46  
47 88 21,932 and 14,127 bp, respectively. The Nanopore raw reads were base-called from their raw FAST5  
48  
49 89 files using Guppy implanted in MinKNOW (Oxford Nanopore, Oxford, UK). Applying a minimum  
50  
51 90 length cutoff of 500 bp, we produced a total of 8,468,912,896 bases data (Supplementary Table S3).  
52  
53 91 Hybrid assembly of all of the filtered reads were carried out using Canu (v1.5) [7] and WTDBG  
54  
55 92 (v1.2.8) [8] tools and the two assemblies were joined with Quickmerge [9], removing the redundancy  
56  
57 93 with Numer [10]. Finally, the genome assembly was corrected using the Illumina reads using Pilon  
58  
59 94 v1.22 (Pilon, RRID: SCR 014731) with default settings [11]. The initial genome assembly was  
60  
61  
62  
63  
64  
65

1  
2  
3  
4  
5  
6  
7  
8  
9  
10  
11  
12  
13  
14  
15  
16  
17  
18  
19  
20  
21  
22  
23  
24  
25  
26  
27  
28  
29  
30  
31  
32  
33  
34  
35  
36  
37  
38  
39  
40  
41  
42  
43  
44  
45  
46  
47  
48  
49  
50  
51  
52  
53  
54  
55  
56  
57  
58  
59  
60  
61  
62  
63  
64  
65

95 884,500,940 bp in length with a contig N50 of 2,388,811 bp (Supplementary Table 4).

96 To evaluate the genome assembly, the assembled genome was firstly subjected to aligning with the  
97 360,937,442 Illumina reads generated in the present study with SAMTools (SAMTOOLS,  
98 RRID:SCR\_002105) [12], and then subjected to comparison with 303 conservative genes in eukaryote  
99 and 978 genes in metazoan with BUSCO v2.0 (BUSCO, RRID:SCR 015008) [13], respectively. As a  
100 result, 97.45 % of the Illumina reads were successfully mapped to the assembled genome. The  
101 BUSCO analysis found 273 and 897 conservative genes belonging to eukaryote and metazoan  
102 datasets, accounting for 90.10% and 91.72% of the totals, respectively (Supplementary Table 5). Thus,  
103 the high alignment ratios revealed in the two above analysis demonstrated the high quality of contig  
104 assembly for the bloody clam.

105 **Hi-C analysis and chromosome assembly**

106 For the Hi-C library, fresh adductor muscle was fixed using formaldehyde with a final concentration  
107 of 1%. The fixed DNA was then digested with the restriction enzyme (*Hind* III), followed by 5'  
108 repairing and labeling with a biotinylated residue. Subsequently, the digested and labeled DNA was  
109 ligated, reversed and sheared to a length of 300-700 bp and purified as previously described [14].  
110 Finally, the purified fragments were used for library preparation as described above and sequenced  
111 using an Illumina HiSeq X Ten platform with 150 paired-end mode. A total of 174,148,156 read pairs  
112 (52.16 Gb) with a Q30 of 93.16% were generated and used for the Hi-C analysis (NCBI SRA accession  
113 number: SAMN10879242).

114 To get the unique mapped read pairs, the 174 million read pairs were first truncated at the putative  
115 Hi-C junctions and then the resulting trimmed reads were aligned to the assembly results using BWA  
116 aligner (BWA, RRID:SCR\_010910) and applying default parameters [15]. Only uniquely aligned pairs  
117 whose mapping qualities higher than 20 were considered for further analysis. A total of 206 million  
118 reads (59.23%) were mapped to the assembled genome, of which 51 million read pairs (29.33%) were  
119 unique mapped read pairs (Supplementary Table 6). Then, the invalid interaction pairs due to  
120 self-circle ligation, dangling ends, re-ligation and the other dumped types were filtered out with  
121 HiC-Prov2.8.1 [16]. After filtration, we obtained 17 million valid interaction pairs (Supplementary  
122 Table 7), accounting for 33.66% of the unique mapped read pairs, which were used for the Hi-C  
123 analysis.



1  
2  
3  
4  
5  
6  
7  
8  
9  
10  
11  
12  
13  
14  
15  
16  
17  
18  
19  
20  
21  
22  
23  
24  
25  
26  
27  
28  
29  
30  
31  
32  
33  
34  
35  
36  
37  
38  
39  
40  
41  
42  
43  
44  
45  
46  
47  
48  
49  
50  
51  
52  
53  
54  
55  
56  
57  
58  
59  
60  
61  
62  
63  
64  
65

124 For chromosome assembly, the pre-assembled contigs were broken into equal length of 300bp and  
125 reassembled with the agglomerative hierarchical clustering method implanted in Lachesis [17].  
126 Finally, 1384 contigs (82.53%) were successfully clustered into 19 groups (Figure 1), which was  
127 consistent with the previous karyotype analyses of the bloody clam [18]. The 1384 clustered contigs  
128 correspond to 878.79 Mb in length, accounting for 99.35% of the total length of the assembled  
129 genome. Further analysis with Lachesis showed that 670 contigs corresponding to 819.17 Mb were  
130 anchored with defined order and orient, accounting for 48.41% and 93.22% of the total genome by  
131 contig number and length, respectively (Supplementary Table 8). Finally, we obtained a  
132 chromosomal-level bloody clam assembly with a contig N50 of 1.80 Mb and scaffold N50 of 45.00 Mb,  
133 which represented the first reference genome of Family Arcidae (Table 2).

134 **Genome annotation**

135 We used LTR FINDER v1.05 (LTR\_Finder, RRID:SCR\_015247) [19], RepeatScout v1.0.5 (RepeatScout,  
136 RRID:SCR 014653) [20] and PILER-DF v2.4 [21] to construct a repetitive sequence library based on  
137 bloody clam genome. Then we used PASTEClassifier v1.0 [22] to classify these repeats and we  
138 merged them with the ones available in the Repbase database [23]. Finally, based on the constructed  
139 library, the repeat sequences of the assembled genome were identified with RepeatMasker v4.0.6  
140 (RepeatMasker, RRID:SCR 012954) [24]. A total of 407.8 Mb sequence was identified as repeated  
141 sequence, representing 46.1% of the total genome length. The statistics of number, length and  
142 percentage of each repeat type could be found in supplementary table 9.

143 We then predicted the protein-coding genes using the following approaches: *ab initio* prediction,  
144 homology-based prediction, and transcriptome-based prediction. For *ab initio* prediction, Genscan  
145 v1.0 (Genscan, RRID:SCR 012902) [25], Augustus v2.4 (Augustus, RRID:SCR 008417) [26],  
146 GlimmerHMM v3.0.4 (GlimmerHMM, RRID:SCR 002654) [27], GeneID v1.4 [28] and SNAP  
147 v2006-07-28 (SNAP, RRID:SCR 002127) [29] were used. For homology-based prediction, protein  
148 sequences of three closely related mollusk species (*Crassostrea gigas*, *Mizuhopecten yessoensis* and  
149 *Mytilus galloprovincialis*) and *Danio rerio* were downloaded from NCBI (NCBI, RRID:SCR\_006472) and  
150 aligned against the assembled genome with GeMoMa v1.3.1 [30]. For the transcriptome-based  
151 prediction, transcriptomic data obtained from a previous study (NCBI SRA accession ID:  
152 PRJNA450478) was used as input data [31]. This data have been *de novo* assembled with Trinity

1  
2  
3  
4  
5 153 software in the previous study [31] and the prediction was carried out with PASA v2.0.2 (PASA,  
6  
7 154 RRID:SCR\_014656) [32] based on the assembled unigenes. We also performed reference-based  
8  
9 155 assembly of the RNA-seq data with Hisat v2.0.4 (HISAT2, RRID:SCR\_015530) and Stringtie v1.2.3  
10  
11 156 [33], then predicted with TransDecoder v2.0 (<http://transdecoder.github.io>) and GeneMark v5.1  
12  
13 157 (GeneMark, RRID:SCR\_011930) [34]. Finally, the results from the three approaches were integrated  
14  
15 158 using EVM v1.1.1 (EVM, RRID:SCR\_014659) [35] and polished with PASA v2.0.2. A total of 24,045  
16  
17 159 genes with an average length of 12,549 bp were predicted from the bloody clam genome assembly  
18  
19 160 (Supplementary Table 10). Pseudogenes were predicted with GeneWise v2.4.1 (GeneWise, RRID:SCR  
20  
21 161 015054) [36], obtaining 1,658 pseudogenes with an average length of 3150.8 bp.  
22  
23 162 The predicted genes were annotated by aligning them to the NCBI non-redundant protein sequences  
24  
25 163 (nr) [37], non-redundant nucleotide (nt) [37], Swissprot (Swissprot, RRID:SCR\_002380) [38], TrEMBL  
26  
27 164 (TrEMBL, RRID:SCR\_002380) [38], KOG [39] and KEGG (KEGG, RRID:SCR\_001120) [40] databases  
28  
29 165 using the BLAST [41] with a maximal e-value of  $1e^{-5}$ ; by aligning to the Pfam database (Pfam,  
30  
31 166 RRID:SCR\_004726) [42] using hmmer V3.0 [43], by aligning to GO (Gene Ontology, RRID:SCR\_002811)  
32  
33 167 [44] terms using the BLAST2GO pipeline (Blast2GO, RRID:SCR\_005828) [45]. As a result, a total of  
34  
35 168 22,308 genes were annotated to at least one database (Table 3, Supplementary 11). There were 21,897  
36  
37 169 genes annotated in nr database, of which 11,772 genes (53.7%) were homologous to *C. gigas* hits  
38  
39 170 (Supplementary Figure 1). There were 5,766 and 13,626 genes annotated in GO and KOG databases  
40  
41 171 respectively, and the functional classification of these genes were presented in Figure 2 and 3,  
42  
43 172 respectively.

43 173 Finally, we predicted non-coding RNAs in the assembled genome of bloody clam based on Rfam  
44  
45 174 (Rfam, RRID:SCR\_007891) [46] and miRBase (miRBase, RRID:SCR\_003152) [47] databases. miRNA  
46  
47 175 and rRNA were predicted using Infernal 1.1 [48], tRNA was predicted with tRNAscan-SE v1.3.1  
48  
49 176 (tRNAscan-SE, RRID:SCR\_010835) [49]. A total of 27 miRNAs, 204 rRNAs and 1561 tRNAs were  
50  
51 177 detected, corresponding to 15, 4 and 25 families, respectively.

52 178  
53  
54 179 **Additional files**  
55  
56 180 Supplementary material.docx  
57  
58 181 Supplementary table11.xlsx  
59  
60  
61  
62  
63  
64  
65

1  
2  
3  
4  
5 182  
6  
7 183 **Availability of Data and Materials**  
8  
9 184 The DNA sequencing data and genome assembly have been deposited in NCBI under the BioProject  
10  
11 185 accession number PRJNA521075. Supporting data are also available via the GigaScience database  
12  
13 186 GigaDB.  
14

15 187  
16 188 **Abbreviations**  
17  
18 189 BLAST: Basic Local Alignment Search Tool; bp: base pair; BUSCO: Benchmarking Universal  
19  
20 190 Single-Copy Orthologs; Gb: gigabase; GO: Gene Ontology; Hi-C: high-throughput chromosome  
21  
22 191 conformation capture; KEGG: Kyoto Encyclopedia of Genes and Genomes; KOG: eukaryotic  
23  
24 192 orthologous groups of proteins; Mb: megabase; NCBI: National Center for Biotechnology  
25  
26 193 Information; PacBio: Pacific Biosciences; RNA-seq: RNA sequencing; SMRT: single-molecule  
27  
28 194 real-time.  
29

30 195  
31  
32 196 **Competing interests**  
33  
34 197 The authors declare that they have no competing interests.  
35

36 198  
37 199 **Funding**  
38  
39 200 This work was financially supported by National Key R&D Program of China (2018YFD0900304),  
40  
41 201 China Agriculture Research System, grant number CARS-49, National Natural Science Foundation of  
42  
43 202 China (31602142 and 31502208).  
44

45 203  
46 204 **Author Contributions:** C.W., C.B. and Q.W. conceived the project; C.W., C.B. and Q.W. collected the  
47  
48 205 samples; C.B., L.X. and Q.W. extracted the genomic DNA and performed genome sequencing; C.B.,  
49  
50 206 L.X. X.D. and U.R. analyzed the data; U.R., B.W. and Z.L. participated in discussions and provided  
51  
52 207 valuable advice; C.B., L.X., U.R., B.W. and Z.L. wrote and revised the manuscript.  
53

54 208  
55  
56  
57  
58  
59  
60  
61  
62  
63  
64  
65

1  
2  
3  
4  
5  
6  
7  
8  
9  
10  
11  
12  
13  
14  
15  
16  
17  
18  
19  
20  
21  
22  
23  
24  
25  
26  
27  
28  
29  
30  
31  
32  
33  
34  
35  
36  
37  
38  
39  
40  
41  
42  
43  
44  
45  
46  
47  
48  
49  
50  
51  
52  
53  
54  
55  
56  
57  
58  
59  
60  
61  
62  
63  
64  
65

209 **Reference:**

1. An HY and Park JY. Ten new highly polymorphic microsatellite loci in the blood clam *Scapharca broughtonii*. Mol Ecol Notes. 2005;5 4:896-8. doi:DOI 10.1111/j.1471-8286.2005.01104.x.
2. Nishida K, Ishimura T, Suzuki A and Sasaki T. Seasonal changes in the shell microstructure of the bloody clam, *Scapharca broughtonii* (Mollusca: Bivalvia: Arcidae). Palaeogeogr Palaeocl. 2012;363:99-108. doi:10.1016/j.palaeo.2012.08.017.
3. Sugiura D, Katayama S, Sasa S and Sasaki K. Age And Growth Of the Ark Shell *Scapharca Broughtonii* (Bivalvia, Arcidae) In Japanese Waters. J Shellfish Res. 2014;33 1:315-24. doi:10.2983/035.033.0130.
4. Tang Q, Qiu X, Wang J, Guo X and Yang A. Resource enhancement of arkshell (*Scapharca (Anadara) broughtonii*) in Shandong offshore waters. Chinese Journal of Applied Ecology. 1994;5 4:396-402.
5. Bai C, Gao W, Wang C, Yu T, Zhang T, Qiu Z, et al. Identification and characterization of ostreid herpesvirus 1 associated with massive mortalities of *Scapharca broughtonii* broodstocks in China. Dis Aquat Organ. 2016;118 1:65-75. doi:10.3354/dao02958.
6. Zhao Q, Wu B, Liu Z, Sun X, Zhou L, Yang A, et al. Molecular cloning, expression and biochemical characterization of hemoglobin gene from ark shell *Scapharca broughtonii*. Fish Shellfish Immunol. 2018;78:60-8. doi:10.1016/j.fsi.2018.03.038.
7. Koren S, Walenz BP, Berlin K, Miller JR, Bergman NH and Phillippy AM. Canu: scalable and accurate long-read assembly via adaptive k-mer weighting and repeat separation. Genome Res. 2017;27 5:722-36. doi:10.1101/gr.215087.116.
8. Jayakumar V and Sakakibara Y. Comprehensive evaluation of non-hybrid genome assembly tools for third-generation PacBio long-read sequence data. Brief Bioinform. 2017; doi:10.1093/bib/bbx147.
9. Chakraborty M, Baldwin-Brown JG, Long AD and Emerson JJ. Contiguous and accurate de novo assembly of metazoan genomes with modest long read coverage. Nucleic Acids Res. 2016;44 19:e147. doi:10.1093/nar/gkw654.
10. Kurtz S, Phillippy A, Delcher AL, Smoot M, Shumway M, Antonescu C, et al. Versatile and open software for comparing large genomes. Genome Biol. 2004;5 2:R12. doi:10.1186/gb-2004-5-2-r12.
11. Walker BJ, Abeel T, Shea T, Priest M, Abouelliel A, Sakthikumar S, et al. Pilon: an integrated tool for comprehensive microbial variant detection and genome assembly improvement. Plos One. 2014;9 11:e112963. doi:10.1371/journal.pone.0112963.
12. Li H, Handsaker B, Wysoker A, Fennell T, Ruan J, Homer N, et al. The Sequence Alignment/Map format and SAMtools. Bioinformatics. 2009;25 16:2078-9. doi:10.1093/bioinformatics/btp352.
13. Simao FA, Waterhouse RM, Ioannidis P, Kriventseva EV and Zdobnov EM. BUSCO: assessing genome assembly and annotation completeness with single-copy orthologs. Bioinformatics. 2015;31 19:3210-2. doi:10.1093/bioinformatics/btv351.
14. Rao SSP, Huntley MH, Durand NC, Stamenova EK, Bochkov ID, Robinson JT, et al. A 3D Map of the Human Genome at Kilobase Resolution Reveals Principles of Chromatin Looping. Cell. 2014;159 7:1665-80. doi:10.1016/j.cell.2014.11.021.

1  
2  
3  
4  
5  
6  
7  
8  
9  
10  
11  
12  
13  
14  
15  
16  
17  
18  
19  
20  
21  
22  
23  
24  
25  
26  
27  
28  
29  
30  
31  
32  
33  
34  
35  
36  
37  
38  
39  
40  
41  
42  
43  
44  
45  
46  
47  
48  
49  
50  
51  
52  
53  
54  
55  
56  
57  
58  
59  
60  
61  
62  
63  
64  
65

252 15. Li H. Aligning sequence reads, clone sequences and assembly contigs with BWA-MEM. arXiv. 2013;1303.3997.

253

254 16. Servant N, Varoquaux N, Lajoie BR, Viara E, Chen CJ, Vert JP, et al. HiC-Pro: an optimized and flexible pipeline for Hi-C data processing. *Genome Biology*. 2015;16 doi:10.1186/s13059-015-0831-x.

255

256

257 17. Burton JN, Adey A, Patwardhan RP, Qiu R, Kitzman JO and Shendure J. Chromosome-scale scaffolding of de novo genome assemblies based on chromatin interactions. *Nat Biotechnol*. 2013;31 12:1119-25. doi:10.1038/nbt.2727.

258

259

260 18. Zhou L and Wang Z-C. Studies on karyotype analysis in the *Scapharca broughtonii*. *Journal of Fisheries of China*. 1997;21 4:455-7.

261

262 19. Xu Z and Wang H. LTR\_FINDER: an efficient tool for the prediction of full-length LTR retrotransposons. *Nucleic Acids Res*. 2007;35 Web Server issue:W265-8. doi:10.1093/nar/gkm286.

263

264

265 20. Price AL, Jones NC and Pevzner PA. De novo identification of repeat families in large genomes. *Bioinformatics*. 2005;21 Suppl 1:i351-8. doi:10.1093/bioinformatics/bti1018.

266

267 21. Edgar RC and Myers EW. PILER: identification and classification of genomic repeats. *Bioinformatics*. 2005;21 Suppl 1:i152-8. doi:10.1093/bioinformatics/bti1003.

268

269 22. Wicker T, Sabot F, Hua-Van A, Bennetzen JL, Capy P, Chalhoub B, et al. A unified classification system for eukaryotic transposable elements. *Nat Rev Genet*. 2007;8 12:973-82. doi:10.1038/nrg2165.

270

271

272 23. Jurka J, Kapitonov VV, Pavlicek A, Klonowski P, Kohany O and Walichiewicz J. Repbase Update, a database of eukaryotic repetitive elements. *Cytogenet Genome Res*. 2005;110 1-4:462-7. doi:10.1159/000084979.

273

274

275 24. Tarailo-Graovac M and Chen N. Using RepeatMasker to identify repetitive elements in genomic sequences. *Curr Protoc Bioinformatics*. 2009;Chapter 4:Unit 4 10. doi:10.1002/0471250953.bi0410s25.

276

277

278 25. Burge C and Karlin S. Prediction of complete gene structures in human genomic DNA. *J Mol Biol*. 1997;268 1:78-94. doi:10.1006/jmbi.1997.0951.

279

280 26. Stanke M and Waack S. Gene prediction with a hidden Markov model and a new intron submodel. *Bioinformatics*. 2003;19 Suppl 2:ii215-25.

281

282 27. Majoros WH, Pertea M and Salzberg SL. TigrScan and GlimmerHMM: two open source ab initio eukaryotic gene-finders. *Bioinformatics*. 2004;20 16:2878-9. doi:10.1093/bioinformatics/bth315.

283

284

285 28. Blanco E, Parra G and Guigó R. Using geneid to identify genes. *Current Protocols in Bioinformatics*. 2007;18 1:4.3.1-4.3.28.

286

287 29. Korf I. Gene finding in novel genomes. *BMC Bioinformatics*. 2004;5:59. doi:10.1186/1471-2105-5-59.

288

289 30. Keilwagen J, Wenk M, Erickson JL, Schattat MH, Grau J and Hartung F. Using intron position conservation for homology-based gene prediction. *Nucleic Acids Res*. 2016;44 9:e89. doi:10.1093/nar/gkw092.

290

291

292 31. Bai CM, Rosani U, Xin LS, Li GY, Li C, Wang QC, et al. Dual transcriptomic analysis of Ostreid herpesvirus 1 infected *Scapharca broughtonii* with an emphasis on viral anti-apoptosis activities and host oxidative bursts. *Fish Shellfish Immun*. 2018;82:554-64.

293

294

1  
2  
3  
4  
5 295 doi:10.1016/j.fsi.2018.08.054.  
6  
7 296 32. Campbell MA, Haas BJ, Hamilton JP, Mount SM and Buell CR. Comprehensive analysis of  
8 297 alternative splicing in rice and comparative analyses with Arabidopsis. *BMC Genomics*.  
9 298 2006;7:327. doi:10.1186/1471-2164-7-327.  
10 299 33. Pertea M, Kim D, Pertea GM, Leek JT and Salzberg SL. Transcript-level expression analysis of  
11 300 RNA-seq experiments with HISAT, StringTie and Ballgown. *Nat Protoc*. 2016;11 9:1650-67.  
12 301 doi:10.1038/nprot.2016.095.  
13 302 34. Tang S, Lomsadze A and Borodovsky M. Identification of protein coding regions in RNA  
14 303 transcripts. *Nucleic Acids Res*. 2015;43 12:e78. doi:10.1093/nar/gkv227.  
15 304 35. Haas BJ, Salzberg SL, Zhu W, Pertea M, Allen JE, Orvis J, et al. Automated eukaryotic gene  
16 305 structure annotation using EVIDENCEModeler and the Program to Assemble Spliced  
17 306 Alignments. *Genome Biol*. 2008;9 1:R7. doi:10.1186/gb-2008-9-1-r7.  
18 307 36. Birney E, Clamp M and Durbin R. GeneWise and Genomewise. *Genome Res*. 2004;14 5:988-95.  
19 308 doi:10.1101/gr.1865504.  
20 309 37. Marchler-Bauer A, Lu S, Anderson JB, Chitsaz F, Derbyshire MK, DeWeese-Scott C, et al.  
21 310 CDD: a Conserved Domain Database for the functional annotation of proteins. *Nucleic Acids*  
22 311 *Res*. 2011;39 Database issue:D225-9. doi:10.1093/nar/gkq1189.  
23 312 38. Boeckmann B, Bairoch A, Apweiler R, Blatter MC, Estreicher A, Gasteiger E, et al. The  
24 313 SWISS-PROT protein knowledgebase and its supplement TrEMBL in 2003. *Nucleic Acids Res*.  
25 314 2003;31 1:365-70.  
26 315 39. Tatusov RL, Natale DA, Garkavtsev IV, Tatusova TA, Shankavaram UT, Rao BS, et al. The  
27 316 COG database: new developments in phylogenetic classification of proteins from complete  
28 317 genomes. *Nucleic Acids Res*. 2001;29 1:22-8.  
29 318 40. Kanehisa M and Goto S. KEGG: kyoto encyclopedia of genes and genomes. *Nucleic Acids*  
30 319 *Res*. 2000;28 1:27-30.  
31 320 41. Altschul SF, Gish W, Miller W, Myers EW and Lipman DJ. Basic local alignment search tool. *J*  
32 321 *Mol Biol*. 1990;215 3:403-10. doi:10.1016/S0022-2836(05)80360-2.  
33 322 42. El-Gebali S, Mistry J, Bateman A, Eddy SR, Luciani A, Potter SC, et al. The Pfam protein  
34 323 families database in 2019. *Nucleic Acids Res*. 2018; doi:10.1093/nar/gky995.  
35 324 43. Eddy SR, Mitchison G and Durbin R. Maximum discrimination hidden Markov models of  
36 325 sequence consensus. *J Comput Biol*. 1995;2 1:9-23. doi:10.1089/cmb.1995.2.9.  
37 326 44. Dimmer EC, Huntley RP, Alam-Faruque Y, Sawford T, O'Donovan C, Martin MJ, et al. The  
38 327 UniProt-GO Annotation database in 2011. *Nucleic Acids Res*. 2012;40 Database issue:D565-70.  
39 328 doi:10.1093/nar/gkr1048.  
40 329 45. Conesa A, Gotz S, Garcia-Gomez JM, Terol J, Talon M and Robles M. Blast2GO: a universal  
41 330 tool for annotation, visualization and analysis in functional genomics research.  
42 331 *Bioinformatics*. 2005;21 18:3674-6. doi:10.1093/bioinformatics/bti610.  
43 332 46. Griffiths-Jones S, Moxon S, Marshall M, Khanna A, Eddy SR and Bateman A. Rfam:  
44 333 annotating non-coding RNAs in complete genomes. *Nucleic Acids Res*. 2005;33 Database  
45 334 issue:D121-4. doi:10.1093/nar/gki081.  
46 335 47. Griffiths-Jones S, Grocock RJ, van Dongen S, Bateman A and Enright AJ. miRBase: microRNA  
47 336 sequences, targets and gene nomenclature. *Nucleic Acids Res*. 2006;34 Database issue:D140-4.  
48 337 doi:10.1093/nar/gkj112.  
49  
50  
51  
52  
53  
54  
55  
56  
57  
58  
59  
60  
61  
62  
63  
64  
65

1  
2  
3  
4  
5  
6  
7  
8  
9  
10  
11  
12  
13  
14  
15  
16  
17  
18  
19  
20  
21  
22  
23  
24  
25  
26  
27  
28  
29  
30  
31  
32  
33  
34  
35  
36  
37  
38  
39  
40  
41  
42  
43  
44  
45  
46  
47  
48  
49  
50  
51  
52  
53  
54  
55  
56  
57  
58  
59  
60  
61  
62  
63  
64  
65

338 48. Nawrocki EP and Eddy SR. Infernal 1.1: 100-fold faster RNA homology searches.  
339 Bioinformatics. 2013;29 22:2933-5. doi:10.1093/bioinformatics/btt509.  
340 49. Lowe TM and Eddy SR. tRNAscan-SE: a program for improved detection of transfer RNA  
341 genes in genomic sequence. Nucleic Acids Res. 1997;25 5:955-64.  
342  
343

1  
2  
3  
4  
5  
6  
7  
8  
9  
10  
11  
12  
13  
14  
15  
16  
17  
18  
19  
20  
21  
22  
23  
24  
25  
26  
27  
28  
29  
30  
31  
32  
33  
34  
35  
36  
37  
38  
39  
40  
41  
42  
43  
44  
45  
46  
47  
48  
49  
50  
51  
52  
53  
54  
55  
56  
57  
58  
59  
60  
61  
62  
63  
64  
65

**Figure legends**

**Figure 1: Hi-C interaction heat map for *Scapharca (Anadara) broughtonii*.**

**Figure 2: Gene ontology (GO) annotation of the predicted genes.**

The horizontal axis indicates classes of the second level GO annotation. The vertical axis indicates the number and percentage of genes in each class.

**Figure 3: Eukaryotic Orthologous Groups (KOG) classification of the predicted genes.**

Results are summarized in 24 function classes according to their functions. The horizontal axis represents each class, and the vertical axis represents the frequency of the classes.



Table 1. Summary of sequencing data generated for bloody clam genome assembly and annotation

| Library type | Platform        | Library size (bp) | Data size (Gb) | Application                              |
|--------------|-----------------|-------------------|----------------|------------------------------------------|
| Short reads  | HiSeq X Ten     | 350               | 53.06          | Genome survey, correction and evaluation |
| Long reads   | PacBio SEQUEL   | 20,000            | 63.33          | Genome assembly                          |
|              | PacBio RS II    | 20,000            | 3.99           |                                          |
|              | Nanopore Minion | 20,000            | 8.47           |                                          |
| Hi-C         | HiSeq X Ten     | 350               | 52.16          | Chromosome construction                  |

**Table 2. Statics of the final genome assembly of *Scapharca (Anadara) broughtonii***

| Types    | Number | Length (bp) | N50 (bp)   | N90 (bp)   | Max (bp)   | GC content | Gap (bp) |
|----------|--------|-------------|------------|------------|------------|------------|----------|
| Scaffold | 1026   | 884,566,040 | 44,995,656 | 25,444,477 | 55,667,740 | 33.70 %    | 65,100   |
| Contig   | 1,667  | 884,500,940 | 1,797,717  | 305,905    | 7,852,409  | 33.70 %    | 0        |

Table 3. Statics of gene annotation to different databases

| Annotation database  | Annotated number | Percentage (%) |
|----------------------|------------------|----------------|
| GO_Annotation        | 5,766            | 23.98%         |
| KEGG_Annotation      | 9,174            | 38.15%         |
| KOG_Annotation       | 13,626           | 56.67%         |
| Pfam_Annotation      | 17,321           | 72.04%         |
| Swissprot_Annotation | 12,866           | 53.51%         |
| TrEMBL_Annotation    | 21,887           | 91.03%         |
| nr_Annotation        | 21,897           | 91.07%         |
| nt_Annotation        | 12,786           | 53.18%         |
| All_Annotated        | 22,308           | 92.78%         |



Figure 2

[Click here to access/download;Figure;Figure2](#)

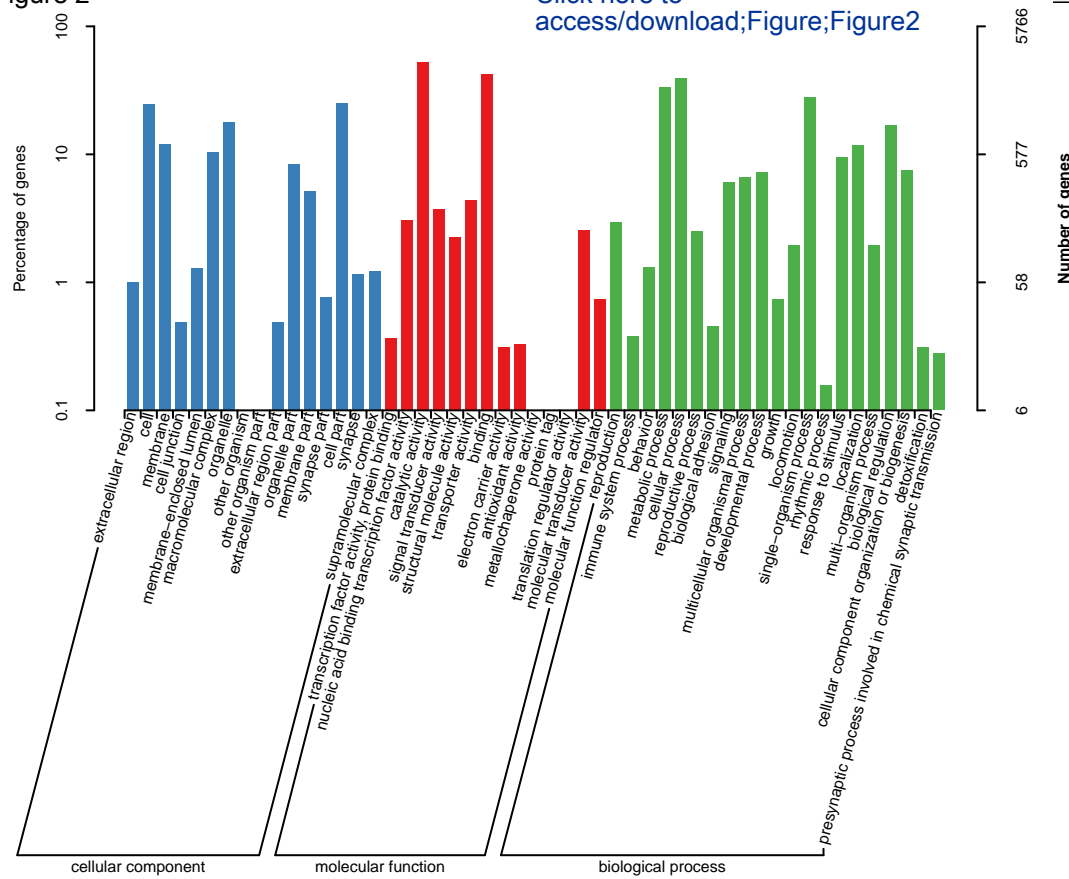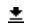

Number of genes

6

58

577

5766

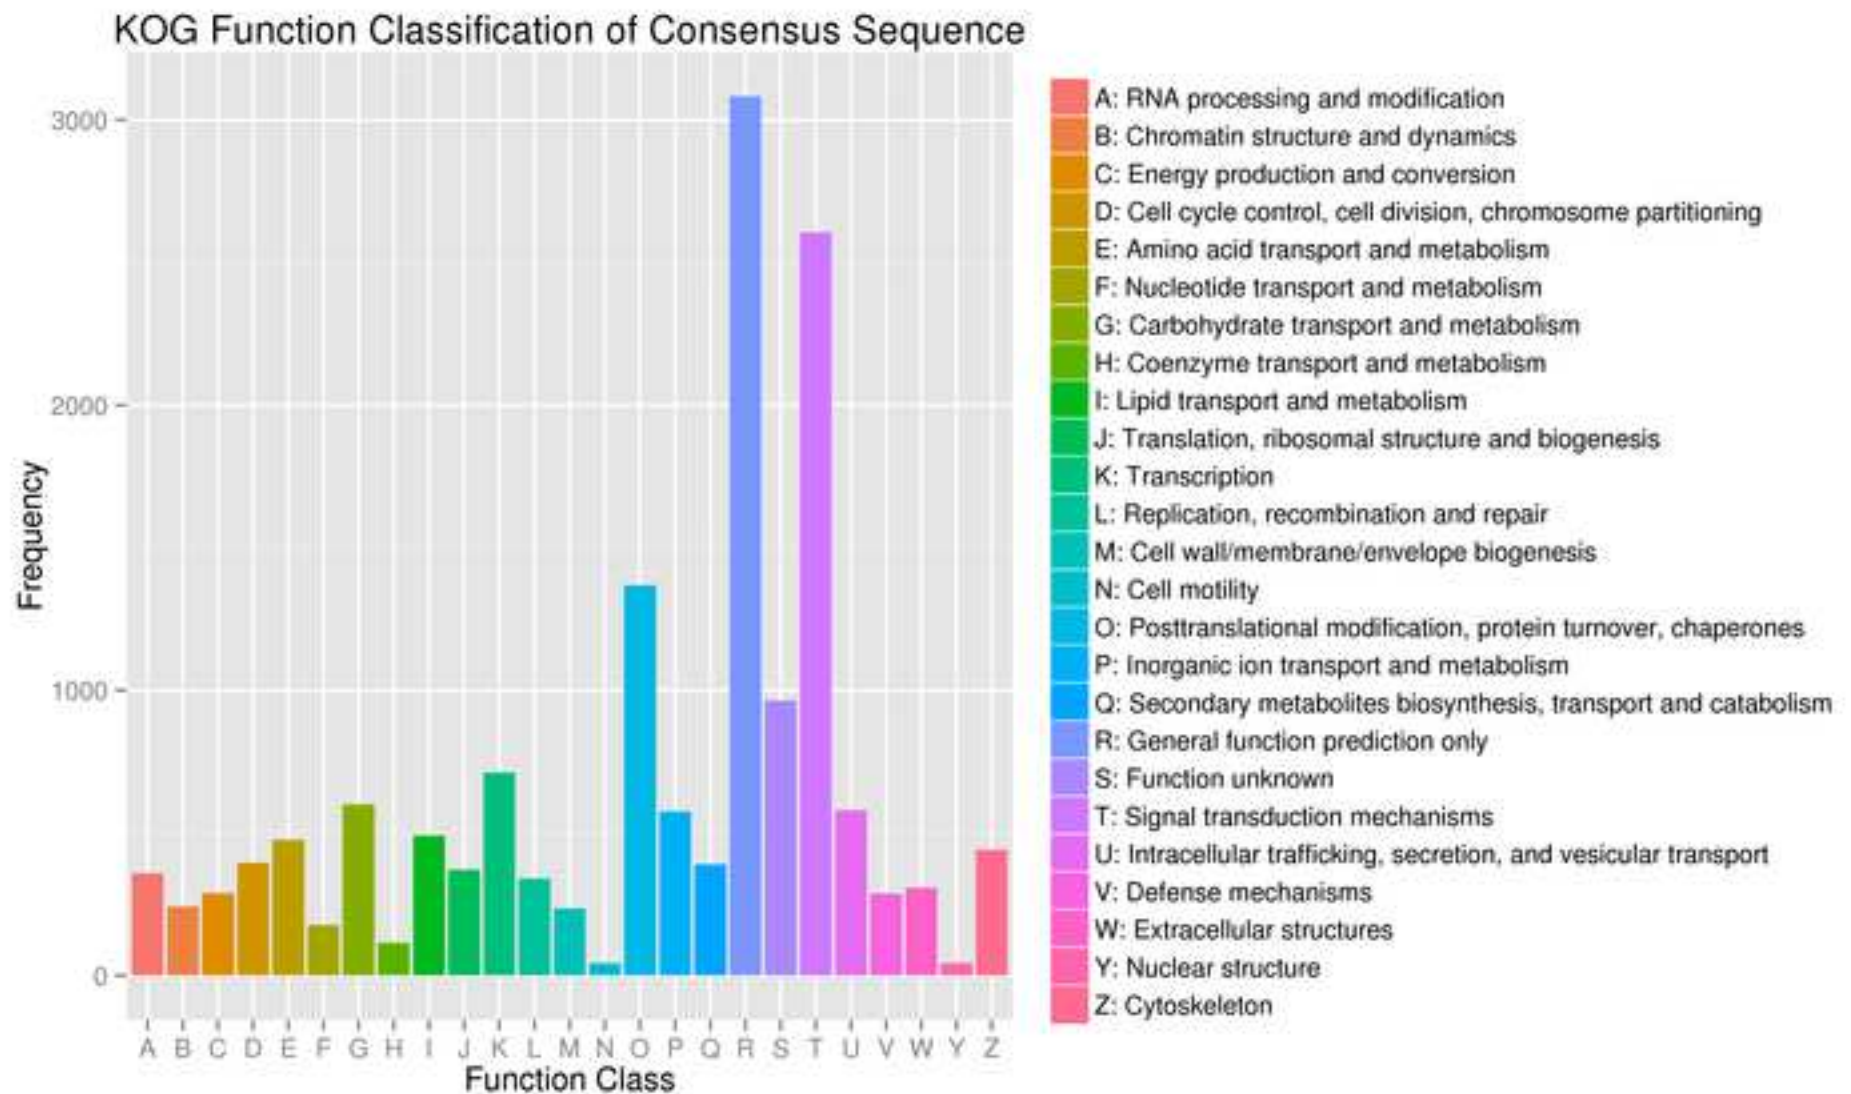



Click here to access/download  
**Supplementary Material**  
Supplementary material.docx



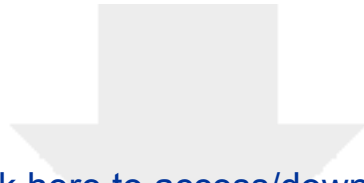

Click here to access/download  
**Supplementary Material**  
Supplementary Table11.xlsx

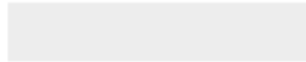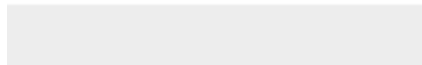



Dr. Laurie Goodman

Editor in Chief

*GigaScience*

Feb 12, 2019

Dear Dr. Goodman

We are pleased to submit a manuscript entitled “Chromosomal-level assembly of the bloody clam, *Scapharca (Anadara) broughtonii*, using long sequence reads and Hi-C” for consideration for publication in *GigaScience*. We confirm that this manuscript has not been published elsewhere. This is the first *de novo* sequencing and assembly of genome sequence belonging to the Family Arcidae, Phylum Mollusca, which provides a rich resource for genomic studies.

We sequenced the bloody clam genome with the Pacbio and Nanopore platforms and generated a total of 75.79 Gb long-reads data representing approx. 86× coverage of the genome. *De novo* assembly of the long reads generated an 884.5 Mb genome with a contig N50 of 1.80 Mb and scaffold N50 of 45.00 Mb, respectively. Hi-C scaffolding of the genome resulted in 19 chromosomes containing 99.35% bases of the assembled genome. Genome annotation revealed that a considerable part of the genome (46.1%) is composed by repeated sequences. Gene prediction identified 24,045 protein-coding genes, and 84.7% of them were annotated in at least one database.

The raw data has been submitted to NCBI SRA database under the PRJNA521075, and a reviewer link to metadata was provided as:

[ftp://ftp-trace.ncbi.nlm.nih.gov/sra/review/SRP183816\\_20190206\\_170212\\_37d5c0b6b354bc3c790d2696b42756c9](ftp://ftp-trace.ncbi.nlm.nih.gov/sra/review/SRP183816_20190206_170212_37d5c0b6b354bc3c790d2696b42756c9). The assembled and analysis results were also transferred to you under the FTP address: <ftp://user95@parrot.genomics.cn>,

which could be found with the following credentials, **username: user95 and password: WangCMClam.**

We recommended the following researchers as potential reviewers for the manuscript:

1. Marta Gomez Chiarri, E-mail: [gomezchi@uri.edu](mailto:gomezchi@uri.edu), Website: <https://web.uri.edu/favs/marta-gomez-chiarri/>
2. Bassem Allam, E-mail: [bassem.allam@stonybrook.edu](mailto:bassem.allam@stonybrook.edu), Website: <https://you.stonybrook.edu/madl/people/faculty/bassem-allam/>
3. Ximing Guo, E-mail: [xguo@hsrl.rutgers.edu](mailto:xguo@hsrl.rutgers.edu), Website: <https://marine.rutgers.edu/main/ximing-guo>
4. Rebeca Moreira, E-mail: [rebecamoreira@iim.csic.es](mailto:rebecamoreira@iim.csic.es), ORCID: <https://orcid.org/0000-0001-7797-7221>

Thanks for your consideration of our manuscript. I look forward to hearing from you.

Sincerely,

Prof. Chong-Ming Wang

*Yellow Sea Fisheries Research Institute (YSFRI)*

E-mail: [wangcm@ysfri.ac.cn](mailto:wangcm@ysfri.ac.cn)
