# Supplementary material for: Chromosomal-level assembly of the blood clam, Scapharca (Anadara) broughtonii, using long sequence reads and Hi-C
Source: PubMed Central journal article supplement (PMC6615981; doi:10.1093/gigascience/giz067), 2019-07-09
Supplement: giz067_giga-d-19-00008_revision_1.pdf [file giz067_giga-d-19-00008_revision_1.pdf]

# GigaScience

## Chromosomal-level assembly of the blood clam, *Scapharca (Anadara) broughtonii*, using long sequence reads and Hi-C --Manuscript Draft--

|                                                      |                                                                                                                                                                                                                                                                                                                                                                                                                                                                                                                                                                                                                                                                                                                                                                                                                                                                                                                                                                                                                                                                                                                                                                                                                                                                                                                                                                                                                                                                     |                       |
|------------------------------------------------------|---------------------------------------------------------------------------------------------------------------------------------------------------------------------------------------------------------------------------------------------------------------------------------------------------------------------------------------------------------------------------------------------------------------------------------------------------------------------------------------------------------------------------------------------------------------------------------------------------------------------------------------------------------------------------------------------------------------------------------------------------------------------------------------------------------------------------------------------------------------------------------------------------------------------------------------------------------------------------------------------------------------------------------------------------------------------------------------------------------------------------------------------------------------------------------------------------------------------------------------------------------------------------------------------------------------------------------------------------------------------------------------------------------------------------------------------------------------------|-----------------------|
| <b>Manuscript Number:</b>                            | GIGA-D-19-00008R1                                                                                                                                                                                                                                                                                                                                                                                                                                                                                                                                                                                                                                                                                                                                                                                                                                                                                                                                                                                                                                                                                                                                                                                                                                                                                                                                                                                                                                                   |                       |
| <b>Full Title:</b>                                   | Chromosomal-level assembly of the blood clam, <i>Scapharca (Anadara) broughtonii</i> , using long sequence reads and Hi-C                                                                                                                                                                                                                                                                                                                                                                                                                                                                                                                                                                                                                                                                                                                                                                                                                                                                                                                                                                                                                                                                                                                                                                                                                                                                                                                                           |                       |
| <b>Article Type:</b>                                 | Data Note                                                                                                                                                                                                                                                                                                                                                                                                                                                                                                                                                                                                                                                                                                                                                                                                                                                                                                                                                                                                                                                                                                                                                                                                                                                                                                                                                                                                                                                           |                       |
| <b>Funding Information:</b>                          | China Agriculture Research System (CARS-49)                                                                                                                                                                                                                                                                                                                                                                                                                                                                                                                                                                                                                                                                                                                                                                                                                                                                                                                                                                                                                                                                                                                                                                                                                                                                                                                                                                                                                         | Prof. Chong-Ming Wang |
|                                                      | National Key R&D Program of China (2018YFD0900304)                                                                                                                                                                                                                                                                                                                                                                                                                                                                                                                                                                                                                                                                                                                                                                                                                                                                                                                                                                                                                                                                                                                                                                                                                                                                                                                                                                                                                  | Dr. Biao Wu           |
|                                                      | National Natural Science Foundation of China (31602142)                                                                                                                                                                                                                                                                                                                                                                                                                                                                                                                                                                                                                                                                                                                                                                                                                                                                                                                                                                                                                                                                                                                                                                                                                                                                                                                                                                                                             | Dr. Biao Wu           |
|                                                      | National Natural Science Foundation of China (31502208)                                                                                                                                                                                                                                                                                                                                                                                                                                                                                                                                                                                                                                                                                                                                                                                                                                                                                                                                                                                                                                                                                                                                                                                                                                                                                                                                                                                                             | Dr. Chang-Ming Bai    |
| <b>Abstract:</b>                                     | <p><b>Background:</b> The blood clam, <i>Scapharca (Anadara) broughtonii</i>, is an economically and ecologically important marine bivalve of the family Arcidae. The efforts that have been made to study their population genetics, breeding, cultivation and stock enrichment were somewhat hindered by the lack of a reference genome. Here, we reported the complete genome sequence of <i>S. broughtonii</i>, a first reference genome of the family Arcidae.</p> <p><b>Funding:</b> A total of 75.79 Gb clean data was generated with the PacBio and Oxford Nanopore platforms, which represented approximately 86× coverage of the <i>S. broughtonii</i> genome. De novo assembly of these long reads resulted in an 884.5 Mb genome, with a contig N50 of 1.80 Mb and scaffold N50 of 45.00 Mb, respectively. Genome Hi-C scaffolding resulted in 19 chromosomes containing 99.35% of bases in the assembled genome. Genome annotation revealed that a considerable part of the genome (46.1%) is composed by repeated sequences, while 24,045 protein-coding genes were predicted and 84.7% of them were annotated.</p> <p><b>Conclusion:</b> We report here the chromosomal-level assembly of the <i>S. broughtonii</i> genome based on long read sequencing and Hi-C scaffolding. The genomic data could be served as reference genome for family Arcidae and will provide a valuable resource for the scientific community and aquaculture sector.</p> |                       |
| <b>Corresponding Author:</b>                         | Chong-Ming Wang<br>YSFRI<br>Qingdao, Shandong CHINA                                                                                                                                                                                                                                                                                                                                                                                                                                                                                                                                                                                                                                                                                                                                                                                                                                                                                                                                                                                                                                                                                                                                                                                                                                                                                                                                                                                                                 |                       |
| <b>Corresponding Author Secondary Information:</b>   |                                                                                                                                                                                                                                                                                                                                                                                                                                                                                                                                                                                                                                                                                                                                                                                                                                                                                                                                                                                                                                                                                                                                                                                                                                                                                                                                                                                                                                                                     |                       |
| <b>Corresponding Author's Institution:</b>           | YSFRI                                                                                                                                                                                                                                                                                                                                                                                                                                                                                                                                                                                                                                                                                                                                                                                                                                                                                                                                                                                                                                                                                                                                                                                                                                                                                                                                                                                                                                                               |                       |
| <b>Corresponding Author's Secondary Institution:</b> |                                                                                                                                                                                                                                                                                                                                                                                                                                                                                                                                                                                                                                                                                                                                                                                                                                                                                                                                                                                                                                                                                                                                                                                                                                                                                                                                                                                                                                                                     |                       |
| <b>First Author:</b>                                 | Chang-Ming Bai, Ph.D.                                                                                                                                                                                                                                                                                                                                                                                                                                                                                                                                                                                                                                                                                                                                                                                                                                                                                                                                                                                                                                                                                                                                                                                                                                                                                                                                                                                                                                               |                       |
| <b>First Author Secondary Information:</b>           |                                                                                                                                                                                                                                                                                                                                                                                                                                                                                                                                                                                                                                                                                                                                                                                                                                                                                                                                                                                                                                                                                                                                                                                                                                                                                                                                                                                                                                                                     |                       |
| <b>Order of Authors:</b>                             | Chang-Ming Bai, Ph.D.                                                                                                                                                                                                                                                                                                                                                                                                                                                                                                                                                                                                                                                                                                                                                                                                                                                                                                                                                                                                                                                                                                                                                                                                                                                                                                                                                                                                                                               |                       |
|                                                      | Lu-Sheng Xin                                                                                                                                                                                                                                                                                                                                                                                                                                                                                                                                                                                                                                                                                                                                                                                                                                                                                                                                                                                                                                                                                                                                                                                                                                                                                                                                                                                                                                                        |                       |
|                                                      | Umberto Rosani                                                                                                                                                                                                                                                                                                                                                                                                                                                                                                                                                                                                                                                                                                                                                                                                                                                                                                                                                                                                                                                                                                                                                                                                                                                                                                                                                                                                                                                      |                       |
|                                                      | Biao Wu                                                                                                                                                                                                                                                                                                                                                                                                                                                                                                                                                                                                                                                                                                                                                                                                                                                                                                                                                                                                                                                                                                                                                                                                                                                                                                                                                                                                                                                             |                       |
|                                                      | Qing-Chen Wang                                                                                                                                                                                                                                                                                                                                                                                                                                                                                                                                                                                                                                                                                                                                                                                                                                                                                                                                                                                                                                                                                                                                                                                                                                                                                                                                                                                                                                                      |                       |
|                                                      | Xiao-Ke Duan                                                                                                                                                                                                                                                                                                                                                                                                                                                                                                                                                                                                                                                                                                                                                                                                                                                                                                                                                                                                                                                                                                                                                                                                                                                                                                                                                                                                                                                        |                       |

|                                                |                                                                                                                                                                                                                                                                                                                                                                                                                                                                                                                                                                                                                                                                                                                                                                                                                                                                                                                                                                                                                                                                                                                                                                                                                                                                                                                                                                                                                                                                                                                                                                                                                                                                                                                                                                                                                                                                                                                                                                                                                                                                                                                                                                                                                                                                                                                                                                                                                                                                                                                                                                                                                                                                                                                                                                                                                                                                                                                                                                                                                                                                                                                                                                                                                                                                                                                                                                                                                                                                                                                                                                                                                                                                                                                                                                                                                                                                          |
|------------------------------------------------|--------------------------------------------------------------------------------------------------------------------------------------------------------------------------------------------------------------------------------------------------------------------------------------------------------------------------------------------------------------------------------------------------------------------------------------------------------------------------------------------------------------------------------------------------------------------------------------------------------------------------------------------------------------------------------------------------------------------------------------------------------------------------------------------------------------------------------------------------------------------------------------------------------------------------------------------------------------------------------------------------------------------------------------------------------------------------------------------------------------------------------------------------------------------------------------------------------------------------------------------------------------------------------------------------------------------------------------------------------------------------------------------------------------------------------------------------------------------------------------------------------------------------------------------------------------------------------------------------------------------------------------------------------------------------------------------------------------------------------------------------------------------------------------------------------------------------------------------------------------------------------------------------------------------------------------------------------------------------------------------------------------------------------------------------------------------------------------------------------------------------------------------------------------------------------------------------------------------------------------------------------------------------------------------------------------------------------------------------------------------------------------------------------------------------------------------------------------------------------------------------------------------------------------------------------------------------------------------------------------------------------------------------------------------------------------------------------------------------------------------------------------------------------------------------------------------------------------------------------------------------------------------------------------------------------------------------------------------------------------------------------------------------------------------------------------------------------------------------------------------------------------------------------------------------------------------------------------------------------------------------------------------------------------------------------------------------------------------------------------------------------------------------------------------------------------------------------------------------------------------------------------------------------------------------------------------------------------------------------------------------------------------------------------------------------------------------------------------------------------------------------------------------------------------------------------------------------------------------------------------------|
|                                                | Zhi-Hong Liu                                                                                                                                                                                                                                                                                                                                                                                                                                                                                                                                                                                                                                                                                                                                                                                                                                                                                                                                                                                                                                                                                                                                                                                                                                                                                                                                                                                                                                                                                                                                                                                                                                                                                                                                                                                                                                                                                                                                                                                                                                                                                                                                                                                                                                                                                                                                                                                                                                                                                                                                                                                                                                                                                                                                                                                                                                                                                                                                                                                                                                                                                                                                                                                                                                                                                                                                                                                                                                                                                                                                                                                                                                                                                                                                                                                                                                                             |
|                                                | Chong-Ming Wang                                                                                                                                                                                                                                                                                                                                                                                                                                                                                                                                                                                                                                                                                                                                                                                                                                                                                                                                                                                                                                                                                                                                                                                                                                                                                                                                                                                                                                                                                                                                                                                                                                                                                                                                                                                                                                                                                                                                                                                                                                                                                                                                                                                                                                                                                                                                                                                                                                                                                                                                                                                                                                                                                                                                                                                                                                                                                                                                                                                                                                                                                                                                                                                                                                                                                                                                                                                                                                                                                                                                                                                                                                                                                                                                                                                                                                                          |
| <b>Order of Authors Secondary Information:</b> |                                                                                                                                                                                                                                                                                                                                                                                                                                                                                                                                                                                                                                                                                                                                                                                                                                                                                                                                                                                                                                                                                                                                                                                                                                                                                                                                                                                                                                                                                                                                                                                                                                                                                                                                                                                                                                                                                                                                                                                                                                                                                                                                                                                                                                                                                                                                                                                                                                                                                                                                                                                                                                                                                                                                                                                                                                                                                                                                                                                                                                                                                                                                                                                                                                                                                                                                                                                                                                                                                                                                                                                                                                                                                                                                                                                                                                                                          |
| <b>Response to Reviewers:</b>                  | <p>Dear GigaScience Editor,</p> <p>We thank you and the two reviewers for the revision of our manuscript. We have read your requests/suggestions and those performed by the reviewers and each of these points have been revised carefully. We have added a figure (Figure 1) to show the shape and color of blood clam's shell and visceral mass. We have prepared a new supplementary table (the new Supplementary table 1) to present the key protocols, that were also uploaded to protocols.io as suggested by you. except that of Hi-C library preparation, We have provided more details of the key steps of Hi-C library construction at Lines 111-120. However, we do not include the very detailed Hi-C library protocol in Supplementary table 1, since it is a business secret of the BioMarker company, and they are still reluctant to provide us these parameters. Here, we provide a point-by-point response to each reviewer's comments.</p> <p>Sincerely,<br/>Chong-Ming Wang<br/>Yellow Sea Fisheries Research Institute (YSFRI)<br/>E-mial: wangcm@ysfri.ac.cn</p> <p>Reviewer #1<br/>General comments:<br/>Functional annotation was fairly extensive through the BLASTing of protein sequences to multiple databases. A statement should be added about the nr annotation as the nr database is not manually curated and is known to have errors that can be propogated. "Functional annotations that are found only in the nr database should not be used to annotate new genomes."<br/>Following reviewer's comments, we have found and removed from the annotation table 41 genes annotated only in the Nr database. Now, we presented a final set of 22, 267 annotated genes.<br/>The supplemental table with the blast annotations only contain the functional annotation without information about the blast score, length of alignment etc. It would be of great value to this data note if this information was added.<br/>Following reviewer's comments, we have added blast score, length of alignment et al. for blast annotations to Nr and Nt databases. The detailed information regarding the functional annotations to each database has been submitted to the GigaScience database (ftp://user95@parrot.genomics.cn) and it can be accessed by the reviewers using our credentials (user: user95 and password: WangCMClam). We prefer to not include all these details to the annotation supplemental table, since it will become difficult to read because of its large size.</p> <p>Specific comments:<br/>1) If available please state the number of places where Hi-C broke contigs in the assembly.<br/>There are 343 broke points during the Hi-C scaffolding process, detailed information has been uploaded to GigaScience database (ftp://user95@parrot.genomics.cn). We have stated this point at Line 136 in the main text.<br/>2) For all programs used please state the verson and all parameters required to replicate your analysis<br/>We have provided the versions and parameters of all programs used in the manuscript at protocols.io and in the new Supplementary Table 1.<br/>3) For all databases used (Kegg, nr KOG etc) please state the version or date of download used in annotation.<br/>We have provided the version or date of download of all databases used in the manuscript at protocols.io and in the new Supplementary Table 1.<br/>4) For the Blast analysis please specify if you used max-target-seq in your BLAST analysis and if you took the Best Blast Hit. How did you decide which Annotation to use?<br/>Yes, we used the max-target-seq in our BLAST analysis with the parameter: -max_target_seqs 100 (we have specified this point at protocols.io and in the new Supplementary Table 1.). For the final annotation we have selected the annotation with the highest score</p> |

5) Please specify which Illumina reads were used during Pilon polishing.  
The illumina reads for genome survey was used during Pilon polishing. We have stated this point at Line 98.

6) Would prefer that the authors include the blast result for each annotation provided in the supplemental table 11.  
Please see the general comments.  
Line 51: The word knew should be know. "Compared to oysters and scallops, we still know very little ..."  
The section containing "knew" have been revised as a whole.

#### Reviewer #2

##### Major points:

The English of the manuscript is poor. In most places where there are issues, it is just awkward but in some places the meaning is not clear.

We have invited a native speaker to kindly revise the language of the manuscript thoroughly. He fixed several language pitfalls and now we hope that the overall language quality is acceptable.

Was the DNA / material used all from the same individual?

We used haemocytes collected from several specimens for DNA extraction, to obtain enough DNA for the different libraries we constructed. We have specified this point in the main text at line 60.

How were the reads filtered (line 91)?

We used a custom perl script to filter the reads shorter than 500 bp. We have stated this point at Lines 93-94.

How many cycles of Pilon were used?

We used three cycles, we have stated this at lines 97-98.

What were the BUSCO results of the merged assembly before removal of redundancy with Numer? Were other tools such as Redundans explored for redundancy reduction?

We reduced the redundancy under the premise of keeping the integrity of the data. The evaluations of the different intermediate datasets were not included, while we displayed the best result. We did not use Redundans or other tools for redundancy reduction, since we were satisfied with the performance of Numer.

Methods used for Hi-C library preparation are inadequate.

We have provided more detailed information about the Hi-C library preparation at lines 111-120. We were not allowed to include some parameters because the protocol is a business secret of the BioMarker company, and they are reluctant to provide us these data.

The procedure described on lines 124-125 is not well explained. Why was this performed?

We have revised this section to provide more details and reasonability about Hi-C assembly at Lines 133-136.

Line 157: "the results of the three approaches" - unclear which three steps are referred to.

This refers to 'ab initio prediction, homology-based prediction, and transcriptome-based prediction', We have revised this point at Line 168 to make it more clear.

Lines 160-161: The procedure to detect pseudogenes is not adequately described. We have revised this section at Lines 171-177.

Availability of Data and Materials - what about the predicted transcripts and protein sequences?

This information has been uploaded to GigaScience database (<ftp://user95@parrot.genomics.cn>) and can be accessed by the reviewers using our credentials (see answer to Rew1), whereas they will immediately released after manuscript acceptance.

##### Minor points:

Line 38: To my knowledge, "ark shell" is a common name used for the entire family Arcidae, not just this species.

We agree with you that "ark shell" is a common name used for the family Arcidae. The *Scapharca (Anadara) broughtonii* is always called 'blood clam' or 'bloody clam' in publications and Asia countries where the species is mainly distributed. So, we have revised this point indicating that 'blood clam' is a species of 'ark shell' (Lines 41-42).

Line 40: Correct "lived" to "lives"

We have replaced "lived" with "lives" at line 43.

|                                                                                                                                                                                                                                                                                                                                                                                                                                                                                                                                     |                                                                                                                                                                                                                                                   |
|-------------------------------------------------------------------------------------------------------------------------------------------------------------------------------------------------------------------------------------------------------------------------------------------------------------------------------------------------------------------------------------------------------------------------------------------------------------------------------------------------------------------------------------|---------------------------------------------------------------------------------------------------------------------------------------------------------------------------------------------------------------------------------------------------|
|                                                                                                                                                                                                                                                                                                                                                                                                                                                                                                                                     | <p>Line 43: Correct "mollusk" to "molluscs"<br/>         We have replaced "mollusk" with "molluscs" at line 46.<br/>         Line 61: Correct "libraries" to "library"<br/>         We have replaced " libraries " with "library" at line 66.</p> |
| <b>Additional Information:</b>                                                                                                                                                                                                                                                                                                                                                                                                                                                                                                      |                                                                                                                                                                                                                                                   |
| <b>Question</b>                                                                                                                                                                                                                                                                                                                                                                                                                                                                                                                     | <b>Response</b>                                                                                                                                                                                                                                   |
| Are you submitting this manuscript to a special series or article collection?                                                                                                                                                                                                                                                                                                                                                                                                                                                       | No                                                                                                                                                                                                                                                |
| <p><b>Experimental design and statistics</b></p> <p>Full details of the experimental design and statistical methods used should be given in the Methods section, as detailed in our <a href="#">Minimum Standards Reporting Checklist</a>. Information essential to interpreting the data presented should be made available in the figure legends.</p> <p>Have you included all the information requested in your manuscript?</p>                                                                                                  | Yes                                                                                                                                                                                                                                               |
| <p><b>Resources</b></p> <p>A description of all resources used, including antibodies, cell lines, animals and software tools, with enough information to allow them to be uniquely identified, should be included in the Methods section. Authors are strongly encouraged to cite <a href="#">Research Resource Identifiers</a> (RRIDs) for antibodies, model organisms and tools, where possible.</p> <p>Have you included the information requested as detailed in our <a href="#">Minimum Standards Reporting Checklist</a>?</p> | Yes                                                                                                                                                                                                                                               |
| <p><b>Availability of data and materials</b></p> <p>All datasets and code on which the conclusions of the paper rely must be either included in your submission or deposited in <a href="#">publicly available repositories</a> (where available and ethically appropriate), referencing such data using</p>                                                                                                                                                                                                                        | Yes                                                                                                                                                                                                                                               |

a unique identifier in the references and in the “Availability of Data and Materials” section of your manuscript.

Have you have met the above requirement as detailed in our [Minimum Standards Reporting Checklist](#)?

[Click here to view linked References](#)

1 **Chromosomal-level assembly of the blood clam, *Scapharca (Anadara) broughtonii*, using long**  
2 **sequence reads and Hi-C**

3  
4 Chang-Ming Bai<sup>a†</sup>, Lu-Sheng Xin<sup>a†</sup>, Umberto Rosani<sup>b,c</sup>, Biao Wu<sup>a</sup>, Qing-Chen Wang<sup>a</sup>, Xiao-Ke Duan<sup>d</sup>,  
5 Zhi-Hong Liu<sup>a</sup>, Chong-Ming Wang<sup>a\*</sup>

6  
7 <sup>a</sup> *Key Laboratory of Maricultural Organism Disease Control, Ministry of Agriculture; Laboratory for Marine*  
8 *Fisheries Science and Food Production Processes, Qingdao National Laboratory for Marine Science and*  
9 *Technology; Qingdao Key Laboratory of Mariculture Epidemiology and Biosecurity; Yellow Sea Fisheries*  
10 *Research Institute, Chinese Academy of Fishery Sciences, Qingdao 266071, China*

11 <sup>b</sup> *Department of Biology, University of Padua, Padua 35121, Italy*

12 <sup>c</sup> *Alfred Wegener Institute – Helmholtz Centre for Polar and Marine Research, Wadden Sea Station Sylt,*  
13 *Germany*

14 <sup>d</sup> *Biomarker Technologies Corporation, Beijing 101200, China*

15

16 † These authors contributed equally to this work.

17 \* Correspondence to: Chong-Ming Wang, E-mail address: [wangcm@ysfri.ac.cn](mailto:wangcm@ysfri.ac.cn).

18

19 Chang-Ming Bai, ORCID: 0000-0001-5476-2455;

20 Lu-Sheng Xin, ORCID: 000-0002-4685-1076;

21 Umberto Rosani, ORCID: 0000-0003-0685-1618;

22 Biao Wu, ORCID: 0000-0002-6522-8140;

23 Chong-Ming Wang, ORCID: 0000-0002-5517-9453.

24

25 **Abstract**

26 **Background:** The blood clam, *Scapharca (Anadara) broughtonii*, is an economically and ecologically  
27 important marine bivalve of the family Arcidae. Efforts that have been made to study their  
28 population genetics, breeding, cultivation and stock enrichment have been somewhat hindered by  
29 the lack of a reference genome. Here, we reported the complete genome sequence of *S. broughtonii*, a  
30 first reference genome of the family Arcidae.

31 **Funding:** A total of 75.79 Gb clean data was generated with the PacBio and Oxford Nanopore  
32 platforms, which represented approximately 86× coverage of the *S. broughtonii* genome. *De novo*  
33 assembly of these long reads resulted in an 884.5 Mb genome, with a contig N50 of 1.80 Mb and  
34 scaffold N50 of 45.00 Mb, respectively. Genome Hi-C scaffolding resulted in 19 chromosomes  
35 containing 99.35% of bases in the assembled genome. Genome annotation revealed that a  
36 considerable part of the genome (46.1%) is composed by repeated sequences, while 24,045  
37 protein-coding genes were predicted and 84.7% of them were annotated.

38 **Conclusion:** We report here the chromosomal-level assembly of the *S. broughtonii* genome based on  
39 long read sequencing and Hi-C scaffolding. The genomic data can serve as a reference for the family  
40 Arcidae and will provide a valuable resource for the scientific community and aquaculture sector.

41

42 *Keywords:* ark shell; PacBio; Hi-C; genomic; chromosomal assembly.

43

44

## 45 **Background information**

46 The blood clam, *Scapharca (Anadara) broughtonii* (Schrenck, 1867; NCBI: txid148819;  
47 marinespecies.org:taxname:591364), is a species of ark shell of the family Arcidae, class  
48 Pteriomorpha, phylum Mollusca. Although most of the approximately 200 species of the family  
49 Arcidae are distributed in tropical areas [1], *S. broughtonii* lives in temperate areas along the coasts of  
50 Northern China, Japan, Korea and the Russian Far East [1, 2]. The name “blood clam” originated  
51 from the red color of their visceral mass, due to the presence of hemoglobin in both tissues and  
52 hemolymph [1, 2], a rare trait in molluscs, but a hallmark of Arcidae species [3]. *S. broughtonii*  
53 specimens are characterized by thick and harder calcareous shells, covered by a hairy brown colored  
54 periostracum colored (Figure 1) [2]. Adult blood clams can reach a shell length of 100 mm [4] and  
55 they are harvested as a source of sashimi, which as bring to the depletion of the wild resources in the  
56 last century. Many efforts have been made to recover the wild population stocks of *S. broughtonii* in  
57 China, Japan and Korea, including intensive farming. Such aquaculture practices have revealed the  
58 susceptibility of *S. broughtonii* to many pathogenic bacteria and viruses, including a variant of the  
59 *Ostreid herpesvirus 1* [1, 5-7]. Compared to other aquaculture-important bivalve species, like oysters,  
60 mussels and scallops, the genomic and transcriptomic resources of Arcidae species are still limited.  
61 Therefore, the understanding of their basic biological processes as well as of more complex  
62 host-pathogen interactions is somewhat hampered. Here, we sequenced the complete genome of *S.*  
63 *broughtonii* at the chromosomal level and we offer it as a valuable resource to develop both scientific  
64 research and aquaculture industry related to Arcidae species.

## 65 **Sample collection and sequencing**

66 Adult *S. broughtonii* specimens were sampled from populations near Jimo, Shandong Province, China.  
67 To overcome the excessive polysaccharide content of *S. broughtonii* tissues, high-quality genomic  
68 DNA was extracted from haemocytes, using DNeasy® Blood & Tissue Kit (Qiagen, p/n 69504) with a  
69 few protocol modifications to remove polysaccharides (the detailed protocol is reported at  
70 protocols.io [8] and Supplementary Table S1). The DNA quantity and quality were measured with  
71 Qubit 3.0 (Thermo Fisher Scientific Inc., Carlsbad, CA, USA) and agarose gel electrophoresis,  
72 respectively. High-quality DNA was used for library preparation and high-throughput sequencing  
73 using PacBio, Nanopore and Illumina platforms (Table 1, BioMarker Technology Co. Ltd., Beijing,



74 China).

75 PacBio sequencing was carried out with the SMRT Bell™ library using a DNA Template Prep Kit 1.0  
76 (Pacific Biosciences, Menlo Park, CA, USA, p/n 100-259-100). All the detailed library preparation  
77 protocols are available on protocols.io [9]. Briefly, the genomic DNA (10 µg) was mechanically  
78 sheared using a Covaris g-Tube (Kbiosciences p/n 520079) to get DNA fragments of approx. 20 Kb in  
79 size. The sheared DNA was DNA-damage and end-repaired using polishing enzymes. Then a  
80 blunt-end ligation reaction followed by exonuclease treatment was conducted to generate the SMRT  
81 Bell™ template. Finally, large fragments (>10 Kb) were enriched with Blue Pippin device (Sage  
82 Science, Inc., Beverly, MA, USA) for sequencing. A total of 15 SMRT cells were processed, 7 with  
83 Sequel and 8 with RS II instruments (Pacific Biosciences), to generate a total of 67.32 Gb PacBio data.  
84 For Oxford Nanopore sequencing, approx. 5 µg of genomic DNA was sheared and size-selected (~20  
85 kb) with the same procedure described above. The selected fragments were processed using the  
86 Ligation Sequencing 1D Kit (Oxford Nanopore, Oxford, UK, p/n SQK-LSK109) according to the  
87 manufacturer's instructions and sequenced using the MinION portable DNA sequencer with the 48  
88 hours run script (Oxford Nanopore), to generate a total of 8.47 Gb data. For Illumina sequencing,  
89 paired-end (PE) library with an insert size of 350 bp was constructed according to the manufacturer's  
90 protocol, and sequenced with an Illumina HiSeq X Ten platform (Illumina Inc. San Diego, CA, USA)  
91 with paired-end 150 (PE150) read layout. A total of 53.06 Gb Illumina data was generated and used  
92 for genome survey, correction and evaluation (Supplementary Table S2). All high-throughput  
93 sequencing data have been deposited at the NCBI SRA database under accession ID SAMN10879241.

#### 94 **Initial genome assembly and evaluation**

95 The Sequel and RS II raw files (bam and H5 formats) were converted into subreads in fasta format  
96 with the standard PacBio SMRT software package, for a total of 63,330,577,481 and 3,990,849,516 base  
97 pairs (bp), respectively. Subreads shorter than 500 bp in size were filtered out, to obtain a clean  
98 dataset of 4,761,097 PacBio reads for a total of 67,260,156,459 bp, with a read N50 of 21,932 and a  
99 mean read length of 14,127 bp (Supplementary Table S3). The Nanopore reads were base-called from  
100 the raw FAST5 files using Guppy implanted in MinKNOW (Oxford Nanopore), applying a minimum  
101 length cutoff of 500 bp, for a total of 8,468,912,896 bp, with a read N50 of 20,804 and a read mean  
102 length of 15,143 bp (Supplementary Table S4). Hybrid assembly of the clean reads were carried out

103 using Canu v1.5 (Canu, RRID:SCR\_015880) [10] and WTDBG v1.1 [11] tools. The two assemblies  
104 were joined using Quickmerge v0.2.2 [12] and the redundancy was removed with Numer v4.0.0 [13].  
105 Finally, the genome assembly was corrected for 3 cycles with the Illumina reads prepared specifically  
106 for genome survey using Pilon v1.22 (Pilon, RRID: SCR 014731) with default settings [14]. This initial  
107 genome assembly was 884,500,940 bp in length with a contig N50 of 2,388,811 bp (Supplementary  
108 Table S5). The detailed parameters of each tool used for genome assembly are available at  
109 protocols.io [15].

110 We evaluated the quality of the initial assembly by mapping the 360,937,442 Illumina reads for  
111 genome survey to the assembly using SAMTools v0.1.18 (SAMTOOLS, RRID:SCR\_002105) [16], and  
112 by searching the 303 eukaryotic and 978 metazoan conserved genes in the assembly using BUSCO  
113 v2.0 (BUSCO, RRID:SCR 015008) [17]. As a result, 97.45 % of the Illumina reads were successfully  
114 mapped to the assembled genome. The BUSCO analysis found 273 and 897 conserved genes  
115 belonging to eukaryote and metazoan datasets, accounting for 90.10 % and 91.72 % of the totals,  
116 respectively (Supplementary Table S6). These results indicated the considerable quality of this initial  
117 genome assembly of *S. broughtonii*.

#### 118 **Hi-C analysis and chromosome assembly**

119 Fresh adductor muscle collected from a single *S. broughtonii* specimen of the same population was  
120 firstly fixed using formaldehyde with a final concentration of 1%. The fixed tissue was then  
121 homogenized with tissue lysis, digested with the restriction enzyme (*Hind* III), *in situ* labeled with a  
122 biotinylated residue and end-repaired. Finally, the DNA was extracted and used for Hi-C library  
123 preparation using the Nextera Mate Pair Sample Preparation Kit (Illumina, p/n FC-132-1001). Briefly  
124 speaking, 5-6 µg DNA was firstly sheared, end-repaired, selected for fragments with a length of  
125 300-700 bp, and captured the biotin-containing fragments. Then the basic standard steps of  
126 dA-tailing, adapter ligation, PCR amplification and purification were carried out. Finally, the quality  
127 of purified library was evaluated with Qubit 3.0 (Thermo Fisher Scientific Inc.), quantitative PCR  
128 (Q-PCR) and Caliper LabChip GX Analyzer (Waltham, MA, USA). The qualified library was  
129 sequenced using an Illumina HiSeq X Ten platform with 150 PE layout. A total of 174,148,156 read  
130 pairs (52.16 Gb) with a Q30 of 93.16% were generated and used for the subsequent Hi-C analysis  
131 (NCBI SRA accession number: SAMN10879242).

132 To get the unique mapped read pairs, the 174 million read pairs were first truncated at the putative  
133 Hi-C junctions and then aligned to the *S. broughtonii* genome assembly using the BWA aligner  
134 v0.7.10-r789 (BWA, RRID:SCR\_010910) [18]. A total of 206 million reads (59.23%) mapped to the  
135 assembled genome, of which 51 million read pairs (29.33%) showed unique mapped read pairs  
136 (Supplementary Table S7). Only the uniquely aligned pairs with a mapping quality higher than 20  
137 were further considered, while the invalid interaction pairs due to self-circle ligation, dangling ends,  
138 re-ligation and the other dumped types were filtered out with HiC-Pro v2.10.0 [19]. A total of 17  
139 million valid interaction pairs, accounting for 33.66% of the unique mapped read pairs  
140 (Supplementary Table S8) were used for the Hi-C analysis. Detailed Hi-C assembly parameters are  
141 available at protocols.io [20].

142 To correct mis-assemblies occurred in the initial assembly, the contigs were broken into 300 bp  
143 fragments and then assembled based on Hi-C data using Lachesis v2e27abb [21]. The genomic  
144 regions characterized by the sudden drop of physical coverage were defined as mis-assemblies and  
145 contigs were broken at that point [22]. As a result, we identified 343 break points in 156 contigs, and  
146 1,645 corrected contigs with a N50 of 1.81 Mb and a length of 884.50 Mb. Then the corrected contigs  
147 were reassembled using Lachesis. Finally, 1,384 contigs (82.53%) were successfully clustered into 19  
148 groups (Figure 2), which was consistent with previous karyotype analyses of *S. broughtonii* [23]. The  
149 1,384 clustered contigs correspond to a length of 878.79 Mb (99.35 % of the length of the corrected  
150 contigs). Among the 1,384 clustered contigs, 670 contigs (819.17 Mb) were anchored with defined  
151 order and orientation, accounting for 48.41% and 93.22% of the reassembled contigs by contig  
152 number and length, respectively (Supplementary Table S9). The final chromosomal-level *S.*  
153 *broughtonii* genome assembly, which represented the first reference genome of Family Arcidae, has a  
154 contig N50 of 1.80 Mb and scaffold N50 of 45.00 Mb (Table 2).

### 155 **Genome annotation**

156 We used LTR FINDER v1.05 (LTR\_Finder, RRID:SCR\_015247) [24], RepeatScout v1.0.5 (RepeatScout,  
157 RRID:SCR\_014653) [25] and PILER-DF v2.4 [26] to construct a library of repetitive sequences based on  
158 the *S. broughtonii* genome. We classified these repeats using PASTEClassifier v1.0 [27] and we merged  
159 them with the Repbase database [28]. Finally, RepeatMasker v4.0.5 (RepeatMasker, RRID:SCR\_012954)  
160 [29] was used to identify and mask the genomic repeated sequences for a total length of 407.8 Mb,

161 representing 46.1% of the total genome length. The statistics of amount, length and percentage of  
162 each repeat type could be found in Supplementary Table S10. Additional methodological information  
163 about genome annotation is available at protocols.io [15].

164 Protein-coding genes were predicted using the following approaches: *ab initio* prediction,  
165 homology-based prediction, and transcriptome-based prediction. For *ab initio* prediction, Genscan  
166 v3.1 (Genscan, RRID:SCR\_012902) [30], Augustus v3.1 (Augustus, RRID:SCR\_008417) [31],  
167 GlimmerHMM v1.2 (GlimmerHMM, RRID:SCR\_002654) [32], GeneID v1.4 [33] and SNAP  
168 v2006-07-28 (SNAP, RRID:SCR\_002127) [34] were used. For homology-based prediction, protein  
169 sequences of three closely related mollusc species (*Crassostrea gigas*, *Mizuhopecten yessoensis* and  
170 *Mytilus galloprovincialis*) and *Danio rerio* were downloaded from NCBI and aligned against the  
171 assembled genome with GeMoMa v1.3.1 [35]. For the transcriptome-based prediction, transcriptomic  
172 data obtained from a previous study (NCBI SRA accession ID: PRJNA450478) [36] were used as input  
173 data. In the previous study [36], RNA-seq data had been *de novo* assembled with Trinity  
174 v.r20140413p1 and the gene predictions were carried out with PASA v2.0.2 (PASA, RRID:SCR\_014656)  
175 [37]. We also performed reference-based assembly of the RNA-seq data with Hisat v2.0.4 (HISAT2,  
176 RRID:SCR\_015530) and Stringtie v1.2.3 [38], then we predicted the genes using TransDecoder v2.0  
177 (<http://transdecoder.github.io>) and GeneMark v5.1 (GeneMark, RRID:SCR\_011930) [39]. All the gene  
178 predictions were integrated using EVM v1.1.1 (EVM, RRID:SCR\_014659) [40], and further modified  
179 with PASA v2.0.2, to obtain a final dataset of 24,045 predicted genes with an average length of 12,549  
180 bp (Supplementary Table S11).

181 Pseudogenes emerge from coding genes that have become non-functional due to accumulation of  
182 mutations [41, 42]. A sequence that is homologous to a normal protein-coding gene but not annotated  
183 as protein-coding genes is likely to be a pseudogene. Therefore, based on homology to known  
184 protein-coding genes, putative pseudogenes were firstly searched in the intergenic regions of the *S.*  
185 *broughtonii* genome using genBlastA v1.0.4 [43]. Then GeneWise v2.4.1 (GeneWise, RRID:SCR\_015054)  
186 [44] was adopted to search the premature stop codons or frameshift mutations in those sequences  
187 and to finally identify a total of 1,658 pseudogenes, with an average length of 3,151 bp.

188 The predicted genes were annotated by aligning them to the NCBI non-redundant protein (nr) [45],  
189 non-redundant nucleotide (nt) [45], Swissprot (Swissprot, RRID:SCR\_002380) [46], TrEMBL (TrEMBL,

190 RRID:SCR\_002380) [46], KOG [47] and KEGG (KEGG, RRID:SCR\_001120) [48] databases using BLAST  
191 v2.2.31 [49] with a maximal e-value of  $1e^{-5}$ ; by aligning to the Pfam database (Pfam, RRID:SCR\_004726)  
192 [50] using HMMer V3.0 [51]. Gene Ontology (GO) terms (Gene Ontology, RRID:SCR\_002811) [52]  
193 were assigned to the genes using the BLAST2GO v2.5 pipeline (Blast2GO, RRID:SCR\_005828) [53].  
194 As a result, a total of 22,267 genes were annotated in at least one database (Table 3, Supplementary  
195 Table S12). Among the 21,897 genes annotated in the nr database, 11,772 genes (53.7%) showed  
196 homology with *C. gigas* hits (Supplementary Figure S1). A total of 5,766 and 13,626 genes were  
197 annotated in GO and KOG databases, respectively, and the functional classification of these genes  
198 were presented in Figure 3 and 4, while the complete gene annotation table is reported in  
199 Supplementary Table 12.

200 Finally, we predicted the non-coding RNAs based on Rfam v12.1 (Rfam, RRID:SCR\_007891) [54] and  
201 miRBase v21.0 (miRBase, RRID:SCR\_003152) [55] databases. Putative miRNAs and rRNAs were  
202 predicted using Infernal v1.1 [56], tRNAs were predicted with tRNAscan-SE v1.3.1 (tRNAscan-SE,  
203 RRID:SCR\_010835) [57]. A total of 27 miRNAs, 204 rRNAs, and 1,561 tRNAs were detected,  
204 corresponding to 15, 4, and 25 families, respectively.

205

#### 206 **Additional files**

207 Supplementary Table S1. Key protocols for chromosome-level genome assembly of *Scapharca*  
208 (*Anadara broughtonii*).

209 Supplementary Table S2. Summary of the Illumina sequencing reads used for genome survey,  
210 correction and evaluation.

211 Supplementary Table S3. Statics of the length distribution of Pacbio Subreads.

212 Supplementary Table S4. Statics of the length distribution of Oxford Nanopore reads.

213 Supplementary Table S5. Statics of the initial genome assembly of *Scapharca (Anadara) broughtonii*.

214 Supplementary Table S6. Summary of BUSCO analysis results.

215 Supplementary Table S7. Statistics of the mapping results of Hi-C reads.

216 Supplementary Table S8. Statistics of different types of the Hi-C reads.

217 Supplementary Table S9. Summary of the Hi-C assembly.

218 Supplementary Table S10. Statistics of the repeated sequences.

219 Supplementary Table S11. Summary of the gene prediction results.  
220 Supplementary Figure S1. Species distribution of BLAST hits of the predicted genes in the NR  
221 database.  
222 Supplementary Table S12. Integrated lists of gene annotation for the assembled *Scapharca (Anadara)*  
223 *broughtonii* genome.

224  
225 **Availability of Data and Materials**

226 The DNA sequencing data and genome assembly have been deposited at the NCBI SRA database  
227 under the BioProject accession number PRJNA521075. Supporting data are also available via the  
228 *GigaScience* database GigaDB [58], and supporting protocols are archived in protocols.io [9].

229  
230 **Abbreviations**

231 BLAST: Basic Local Alignment Search Tool; bp: base pair; BUSCO: Benchmarking Universal  
232 Single-Copy Orthologs; Gb: gigabase; GO: Gene Ontology; Hi-C: high-throughput chromosome  
233 conformation capture; KEGG: Kyoto Encyclopedia of Genes and Genomes; KOG: eukaryotic  
234 orthologous groups of proteins; Mb: megabase; NCBI: National Center for Biotechnology  
235 Information; PacBio: Pacific Biosciences; RNA-seq: RNA sequencing; SMRT: single-molecule  
236 real-time.

237  
238 **Competing interests**

239 The authors declare that they have no competing interests.

240  
241 **Funding**

242 This work was financially supported by National Key R&D Program of China (2018YFD0900304),  
243 China Agriculture Research System, grant number CARS-49, National Natural Science Foundation of  
244 China (31602142 and 31502208).

245  
246 **Author Contributions:** C.W., C.B. and Q.W. conceived the project; C.W., C.B. and Q.W. collected the  
247 samples; C.B., L.X. and Q.W. extracted the genomic DNA and performed genome sequencing; C.B.,

248 L.X. X.D. and U.R. analyzed the data; U.R., B.W. and Z.L. participated in discussions and provided  
249 valuable advice; C.B., L.X., U.R., B.W. and Z.L. wrote and revised the manuscript.

250 **Acknowledgements**

251 We are grateful to Neal Scheraga for the language revision.

252

253 **Reference:**

- 254 1. An HY and Park JY. Ten new highly polymorphic microsatellite loci in the blood clam *Scapharca*  
 255 *broughtonii*. *Mol Ecol Notes*. 2005;5 4:896-8. doi:DOI 10.1111/j.1471-8286.2005.01104.x.
- 256 2. Nishida K, Ishimura T, Suzuki A and Sasaki T. Seasonal changes in the shell microstructure of the bloody  
 257 clam, *Scapharca broughtonii* (Mollusca: Bivalvia: Arcidae). *Palaeogeogr Palaeocl*. 2012;363:99-108.  
 258 doi:10.1016/j.palaeo.2012.08.017.
- 259 3. Boyd SE. Order Arcoida. In: Beesley PL, Ross GJB and Wells A, editors. *Mollusca: The Southern Synthesis*  
 260 *Fauna of Australia*, vol 5. Melbourne: CSIRO Publishing; 1998. p. 253–61.
- 261 4. Sugiura D, Katayama S, Sasa S and Sasaki K. Age And Growth Of the Ark Shell *Scapharca Broughtonii*  
 262 (Bivalvia, Arcidae) In Japanese Waters. *J Shellfish Res*. 2014;33 1:315-24. doi:10.2983/035.033.0130.
- 263 5. Tang Q, Qiu X, Wang J, Guo X and Yang A. Resource enhancement of arkshell (*Scapharca (Anadara)*  
 264 *broughtonii*) in Shandong offshore waters. *Chinese Journal of Applied Ecology*. 1994;5 4:396-402.
- 265 6. Bai C, Gao W, Wang C, Yu T, Zhang T, Qiu Z, et al. Identification and characterization of ostreid  
 266 herpesvirus 1 associated with massive mortalities of *Scapharca broughtonii* broodstocks in China. *Dis*  
 267 *Aquat Organ*. 2016;118 1:65-75. doi:10.3354/dao02958.
- 268 7. Zhao Q, Wu B, Liu Z, Sun X, Zhou L, Yang A, et al. Molecular cloning, expression and biochemical  
 269 characterization of hemoglobin gene from ark shell *Scapharca broughtonii*. *Fish Shellfish Immunol*.  
 270 2018;78:60-8. doi:10.1016/j.fsi.2018.03.038.
- 271 8. Chang-Ming Bai, Lu-Sheng Xin, Umberto Rosani, Biao Wu, Qing-Chen Wang, Xiao-Ke Duan, et al.  
 272 Extration of *Scapharca broughtonii* genomic DNA. *protocols.io*. 2019;  
 273 <https://dx.doi.org/10.17504/protocols.io.zhaf32e>.
- 274 9. Chang-Ming Bai, Lu-Sheng Xin, Umberto Rosani, Biao Wu, Qing-Chen Wang, Xiao-Ke Duan, et al. Key  
 275 protocols for chromosome-level genome assembly of the *Scapharca (Anadara) broughtonii*. *protocols.io*.  
 276 2019; <https://dx.doi.org/10.17504/protocols.io.zimf4c6>.
- 277 10. Koren S, Walenz BP, Berlin K, Miller JR, Bergman NH and Phillippy AM. Canu: scalable and accurate  
 278 long-read assembly via adaptive k-mer weighting and repeat separation. *Genome Res*. 2017;27 5:722-36.  
 279 doi:10.1101/gr.215087.116.
- 280 11. Jayakumar V and Sakakibara Y. Comprehensive evaluation of non-hybrid genome assembly tools for  
 281 third-generation PacBio long-read sequence data. *Brief Bioinform*. 2017; doi:10.1093/bib/bbx147.
- 282 12. Chakraborty M, Baldwin-Brown JG, Long AD and Emerson JJ. Contiguous and accurate de novo assembly  
 283 of metazoan genomes with modest long read coverage. *Nucleic Acids Res*. 2016;44 19:e147.  
 284 doi:10.1093/nar/gkw654.
- 285 13. Kurtz S, Phillippy A, Delcher AL, Smoot M, Shumway M, Antonescu C, et al. Versatile and open software  
 286 for comparing large genomes. *Genome Biol*. 2004;5 2:R12. doi:10.1186/gb-2004-5-2-r12.
- 287 14. Walker BJ, Abeel T, Shea T, Priest M, Abouelliel A, Sakthikumar S, et al. Pilon: an integrated tool for  
 288 comprehensive microbial variant detection and genome assembly improvement. *Plos One*. 2014;9  
 289 11:e112963. doi:10.1371/journal.pone.0112963.
- 290 15. Chang-Ming Bai, Lu-Sheng Xin, Umberto Rosani, Biao Wu, Qing-Chen Wang, Xiao-Ke Duan, et al. The  
 291 pipeline of assembly and annotation of the *Scapharca broughtonii* genome. *protocols.io*. 2019;  
 292 <https://dx.doi.org/10.17504/protocols.io.z7zf9p6>.
- 293 16. Li H, Handsaker B, Wysoker A, Fennell T, Ruan J, Homer N, et al. The Sequence Alignment/Map format  
 294 and SAMtools. *Bioinformatics*. 2009;25 16:2078-9. doi:10.1093/bioinformatics/btp352.
- 295 17. Simao FA, Waterhouse RM, Ioannidis P, Kriventseva EV and Zdobnov EM. BUSCO: assessing genome  
 296 assembly and annotation completeness with single-copy orthologs. *Bioinformatics*. 2015;31 19:3210-2.  
 297 doi:10.1093/bioinformatics/btv351.
- 298 18. Li H. Aligning sequence reads, clone sequences and assembly contigs with BWA-MEM. *arXiv*.  
 299 2013;1303.3997.
- 300 19. Servant N, Varoquaux N, Lajoie BR, Viara E, Chen CJ, Vert JP, et al. HiC-Pro: an optimized and flexible  
 301 pipeline for Hi-C data processing. *Genome Biology*. 2015;16 doi:ARTN 259  
 302 10.1186/s13059-015-0831-x.
- 303 20. Chang-Ming Bai, Lu-Sheng Xin, Umberto Rosani, Biao Wu, Qing-Chen Wang, Xiao-Ke Duan, et al. The  
 304 pipeline of Hi-C assembly of the *Scapharca broughtonii* genome. *protocols.io*. 2019;  
 305 <https://dx.doi.org/10.17504/protocols.io.z8cf9sw>.



- 306 21. Burton JN, Adey A, Patwardhan RP, Qiu R, Kitzman JO and Shendure J. Chromosome-scale scaffolding of  
307 de novo genome assemblies based on chromatin interactions. *Nat Biotechnol.* 2013;31 12:1119-25.  
308 doi:10.1038/nbt.2727.
- 309 22. Jay Ghurye, Mihai Pop, Sergey Koren, Derek Bickhart and Chin C-S. Scaffolding of long read assemblies  
310 using long range contact information. *BMC Genomics.* 2017;18:527.
- 311 23. Zhou L and Wang Z-C. Studies on karyotype analysis in the *Scapharca broughtonii*. *Journal of Fisheries of*  
312 *China.* 1997;21 4:455-7.
- 313 24. Xu Z and Wang H. LTR\_FINDER: an efficient tool for the prediction of full-length LTR retrotransposons.  
314 *Nucleic Acids Res.* 2007;35 Web Server issue:W265-8. doi:10.1093/nar/gkm286.
- 315 25. Price AL, Jones NC and Pevzner PA. De novo identification of repeat families in large genomes.  
316 *Bioinformatics.* 2005;21 Suppl 1:i351-8. doi:10.1093/bioinformatics/bti1018.
- 317 26. Edgar RC and Myers EW. PILER: identification and classification of genomic repeats. *Bioinformatics.*  
318 2005;21 Suppl 1:i152-8. doi:10.1093/bioinformatics/bti1003.
- 319 27. Wicker T, Sabot F, Hua-Van A, Bennetzen JL, Capy P, Chalhoub B, et al. A unified classification system for  
320 eukaryotic transposable elements. *Nat Rev Genet.* 2007;8 12:973-82. doi:10.1038/nrg2165.
- 321 28. Jurka J, Kapitonov VV, Pavlicek A, Klonowski P, Kohany O and Walichiewicz J. Repbase Update, a  
322 database of eukaryotic repetitive elements. *Cytogenet Genome Res.* 2005;110 1-4:462-7.  
323 doi:10.1159/000084979.
- 324 29. Tarailo-Graovac M and Chen N. Using RepeatMasker to identify repetitive elements in genomic sequences.  
325 *Curr Protoc Bioinformatics.* 2009;Chapter 4:Unit 4 10. doi:10.1002/0471250953.bi0410s25.
- 326 30. Burge C and Karlin S. Prediction of complete gene structures in human genomic DNA. *J Mol Biol.*  
327 1997;268 1:78-94. doi:10.1006/jmbi.1997.0951.
- 328 31. Stanke M and Waack S. Gene prediction with a hidden Markov model and a new intron submodel.  
329 *Bioinformatics.* 2003;19 Suppl 2:ii215-25.
- 330 32. Majoros WH, Pertea M and Salzberg SL. TigrScan and GlimmerHMM: two open source ab initio  
331 eukaryotic gene-finders. *Bioinformatics.* 2004;20 16:2878-9. doi:10.1093/bioinformatics/bth315.
- 332 33. Blanco E, Parra G and Guigó R. Using geneid to identify genes. *Current Protocols in Bioinformatics.*  
333 2007;18 1:4.3.1-4.3.28.
- 334 34. Korf I. Gene finding in novel genomes. *BMC Bioinformatics.* 2004;5:59. doi:10.1186/1471-2105-5-59.
- 335 35. Keilwagen J, Wenk M, Erickson JL, Schattat MH, Grau J and Hartung F. Using intron position conservation  
336 for homology-based gene prediction. *Nucleic Acids Res.* 2016;44 9:e89. doi:10.1093/nar/gkw092.
- 337 36. Bai CM, Rosani U, Xin LS, Li GY, Li C, Wang QC, et al. Dual transcriptomic analysis of *Ostreid*  
338 *herpesvirus 1* infected *Scapharca broughtonii* with an emphasis on viral anti-apoptosis activities and host  
339 oxidative bursts. *Fish Shellfish Immun.* 2018;82:554-64. doi:10.1016/j.fsi.2018.08.054.
- 340 37. Campbell MA, Haas BJ, Hamilton JP, Mount SM and Buell CR. Comprehensive analysis of alternative  
341 splicing in rice and comparative analyses with *Arabidopsis*. *BMC Genomics.* 2006;7:327.  
342 doi:10.1186/1471-2164-7-327.
- 343 38. Pertea M, Kim D, Pertea GM, Leek JT and Salzberg SL. Transcript-level expression analysis of RNA-seq  
344 experiments with HISAT, StringTie and Ballgown. *Nat Protoc.* 2016;11 9:1650-67.  
345 doi:10.1038/nprot.2016.095.
- 346 39. Tang S, Lomsadze A and Borodovsky M. Identification of protein coding regions in RNA transcripts.  
347 *Nucleic Acids Res.* 2015;43 12:e78. doi:10.1093/nar/gkv227.
- 348 40. Haas BJ, Salzberg SL, Zhu W, Pertea M, Allen JE, Orvis J, et al. Automated eukaryotic gene structure  
349 annotation using EVIDENCEModeler and the Program to Assemble Spliced Alignments. *Genome Biol.*  
350 2008;9 1:R7. doi:10.1186/gb-2008-9-1-r7.
- 351 41. Xiao J, Sekhwal MK, Li P, Ragupathy R, Cloutier S, Wang X, et al. Pseudogenes and Their Genome-Wide  
352 Prediction in Plants. *International Journal of Molecular Sciences.* 2016;17 12:1991.
- 353 42. Thibaud-Nissen F, Ouyang S and Buell CR. Identification and characterization of pseudogenes in the rice  
354 gene complement. *BMC Genomics.* 2009;10:317. doi:10.1186/1471-2164-10-317.
- 355 43. She R, Chu SC, Uyar B, Wang J, Wang K and Chen N. genBlastG: using BLAST searches to build  
356 homologous gene models. *Bioinformatics.* 2011;27 15:2141-3.
- 357 44. Birney E, Clamp M and Durbin R. GeneWise and Genomewise. *Genome Res.* 2004;14 5:988-95.  
358 doi:10.1101/gr.1865504.
- 359 45. Marchler-Bauer A, Lu S, Anderson JB, Chitsaz F, Derbyshire MK, DeWeese-Scott C, et al. CDD: a

360 Conserved Domain Database for the functional annotation of proteins. *Nucleic Acids Res.* 2011;39  
361 Database issue:D225-9. doi:10.1093/nar/gkq1189.

362 46. Boeckmann B, Bairoch A, Apweiler R, Blatter MC, Estreicher A, Gasteiger E, et al. The SWISS-PROT  
363 protein knowledgebase and its supplement TrEMBL in 2003. *Nucleic Acids Res.* 2003;31 1:365-70.

364 47. Tatusov RL, Natale DA, Garkavtsev IV, Tatusova TA, Shankavaram UT, Rao BS, et al. The COG database:  
365 new developments in phylogenetic classification of proteins from complete genomes. *Nucleic Acids Res.*  
366 2001;29 1:22-8.

367 48. Kanehisa M and Goto S. KEGG: kyoto encyclopedia of genes and genomes. *Nucleic Acids Res.* 2000;28  
368 1:27-30.

369 49. Altschul SF, Gish W, Miller W, Myers EW and Lipman DJ. Basic local alignment search tool. *J Mol Biol.*  
370 1990;215 3:403-10. doi:10.1016/S0022-2836(05)80360-2.

371 50. El-Gebali S, Mistry J, Bateman A, Eddy SR, Luciani A, Potter SC, et al. The Pfam protein families database  
372 in 2019. *Nucleic Acids Res.* 2018; doi:10.1093/nar/gky995.

373 51. Eddy SR, Mitchison G and Durbin R. Maximum discrimination hidden Markov models of sequence  
374 consensus. *J Comput Biol.* 1995;2 1:9-23. doi:10.1089/cmb.1995.2.9.

375 52. Dimmer EC, Huntley RP, Alam-Faruque Y, Sawford T, O'Donovan C, Martin MJ, et al. The UniProt-GO  
376 Annotation database in 2011. *Nucleic Acids Res.* 2012;40 Database issue:D565-70.  
377 doi:10.1093/nar/gkr1048.

378 53. Conesa A, Gotz S, Garcia-Gomez JM, Terol J, Talon M and Robles M. Blast2GO: a universal tool for  
379 annotation, visualization and analysis in functional genomics research. *Bioinformatics.* 2005;21 18:3674-6.  
380 doi:10.1093/bioinformatics/bti610.

381 54. Griffiths-Jones S, Moxon S, Marshall M, Khanna A, Eddy SR and Bateman A. Rfam: annotating  
382 non-coding RNAs in complete genomes. *Nucleic Acids Res.* 2005;33 Database issue:D121-4.  
383 doi:10.1093/nar/gki081.

384 55. Griffiths-Jones S, Grocock RJ, van Dongen S, Bateman A and Enright AJ. miRBase: microRNA sequences,  
385 targets and gene nomenclature. *Nucleic Acids Res.* 2006;34 Database issue:D140-4.  
386 doi:10.1093/nar/gkj112.

387 56. Nawrocki EP and Eddy SR. Infernal 1.1: 100-fold faster RNA homology searches. *Bioinformatics.* 2013;29  
388 22:2933-5. doi:10.1093/bioinformatics/btt509.

389 57. Lowe TM and Eddy SR. tRNAscan-SE: a program for improved detection of transfer RNA genes in  
390 genomic sequence. *Nucleic Acids Res.* 1997;25 5:955-64.

391 58. Bai C; Xin L; Rosani U; Wu B; Wang Q; Duan X; Liu Z; Wang C (2019): Supporting data for  
392 "Chromosomal-level assembly of the blood clam, *Scapharca (Anadara) broughtonii*, using long sequence  
393 reads and Hi-C" GigaScience Database. <http://dx.doi.org/10.5524/100607>  
394  
395

396 **Figure legends**

397

398 **Figure 1. Example of a *Scapharca (Anadara) broughtonii*, the blood clam.**

399

400 **Figure 2. Hi-C interaction heat map for *Scapharca (Anadara) broughtonii*.**

401

402 **Figure 3. Gene ontology (GO) annotation of the predicted genes.**

403 The horizontal axis indicates classes of the second level GO annotation. The vertical axis indicates the  
404 number and percentage of genes in each class.

405

406 **Figure 4. Eukaryotic Orthologous Groups (KOG) classification of the predicted genes.**

407 Results are summarized in 24 function classes according to their functions. The horizontal axis  
408 represents each class, and the vertical axis represents the frequency of the classes.

Table 1. Summary of sequencing data generated for bloody clam genome assembly and annotation

| Library type | Platform        | Library size (bp) | Data size (Gb) | Application                              |
|--------------|-----------------|-------------------|----------------|------------------------------------------|
| Short reads  | HiSeq X Ten     | 350               | 53.06          | Genome survey, correction and evaluation |
| Long reads   | PacBio SEQUEL   | 20,000            | 63.33          | Genome assembly                          |
|              | PacBio RS II    | 20,000            | 3.99           |                                          |
|              | Nanopore Minion | 20,000            | 8.47           |                                          |
| Hi-C         | HiSeq X Ten     | 350               | 52.16          | Chromosome construction                  |

**Table 2. Statics of the final genome assembly of *Scapharca (Anadara) broughtonii***

| Types    | Number | Length (bp) | N50 (bp)   | N90 (bp)   | Max (bp)   | GC content | Gap (bp) |
|----------|--------|-------------|------------|------------|------------|------------|----------|
| Scaffold | 1026   | 884,566,040 | 44,995,656 | 25,444,477 | 55,667,740 | 33.70 %    | 65,100   |
| Contig   | 1,667  | 884,500,940 | 1,797,717  | 305,905    | 7,852,409  | 33.70 %    | 0        |

Table 3. Statics of gene annotation to different databases

| Annotation database  | Annotated number | Percentage (%) |
|----------------------|------------------|----------------|
| GO_Annotation        | 5,766            | 23.98          |
| KEGG_Annotation      | 9,174            | 38.15          |
| KOG_Annotation       | 13,626           | 56.67          |
| Pfam_Annotation      | 17,321           | 72.04          |
| Swissprot_Annotation | 12,866           | 53.51          |
| TrEMBL_Annotation    | 21,887           | 91.03          |
| nr_Annotation        | 21,897           | 91.07          |
| nt_Annotation        | 12,786           | 53.18          |
| All_Annotated        | 22,267           | 92.61          |

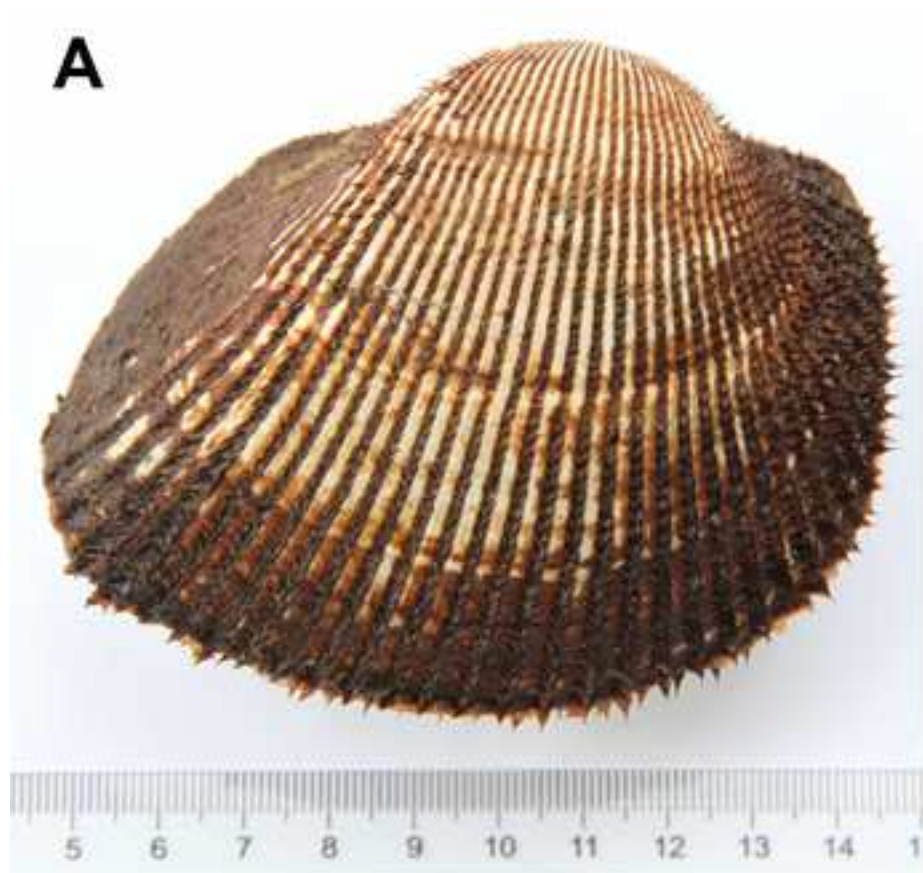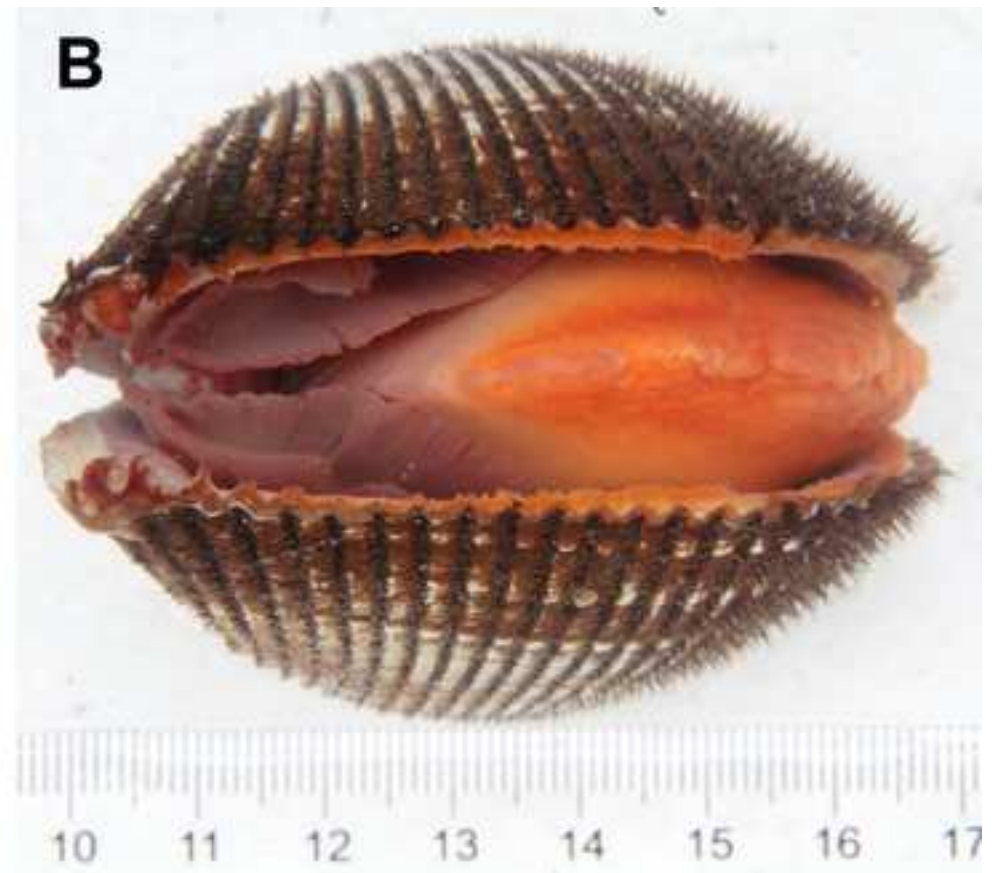

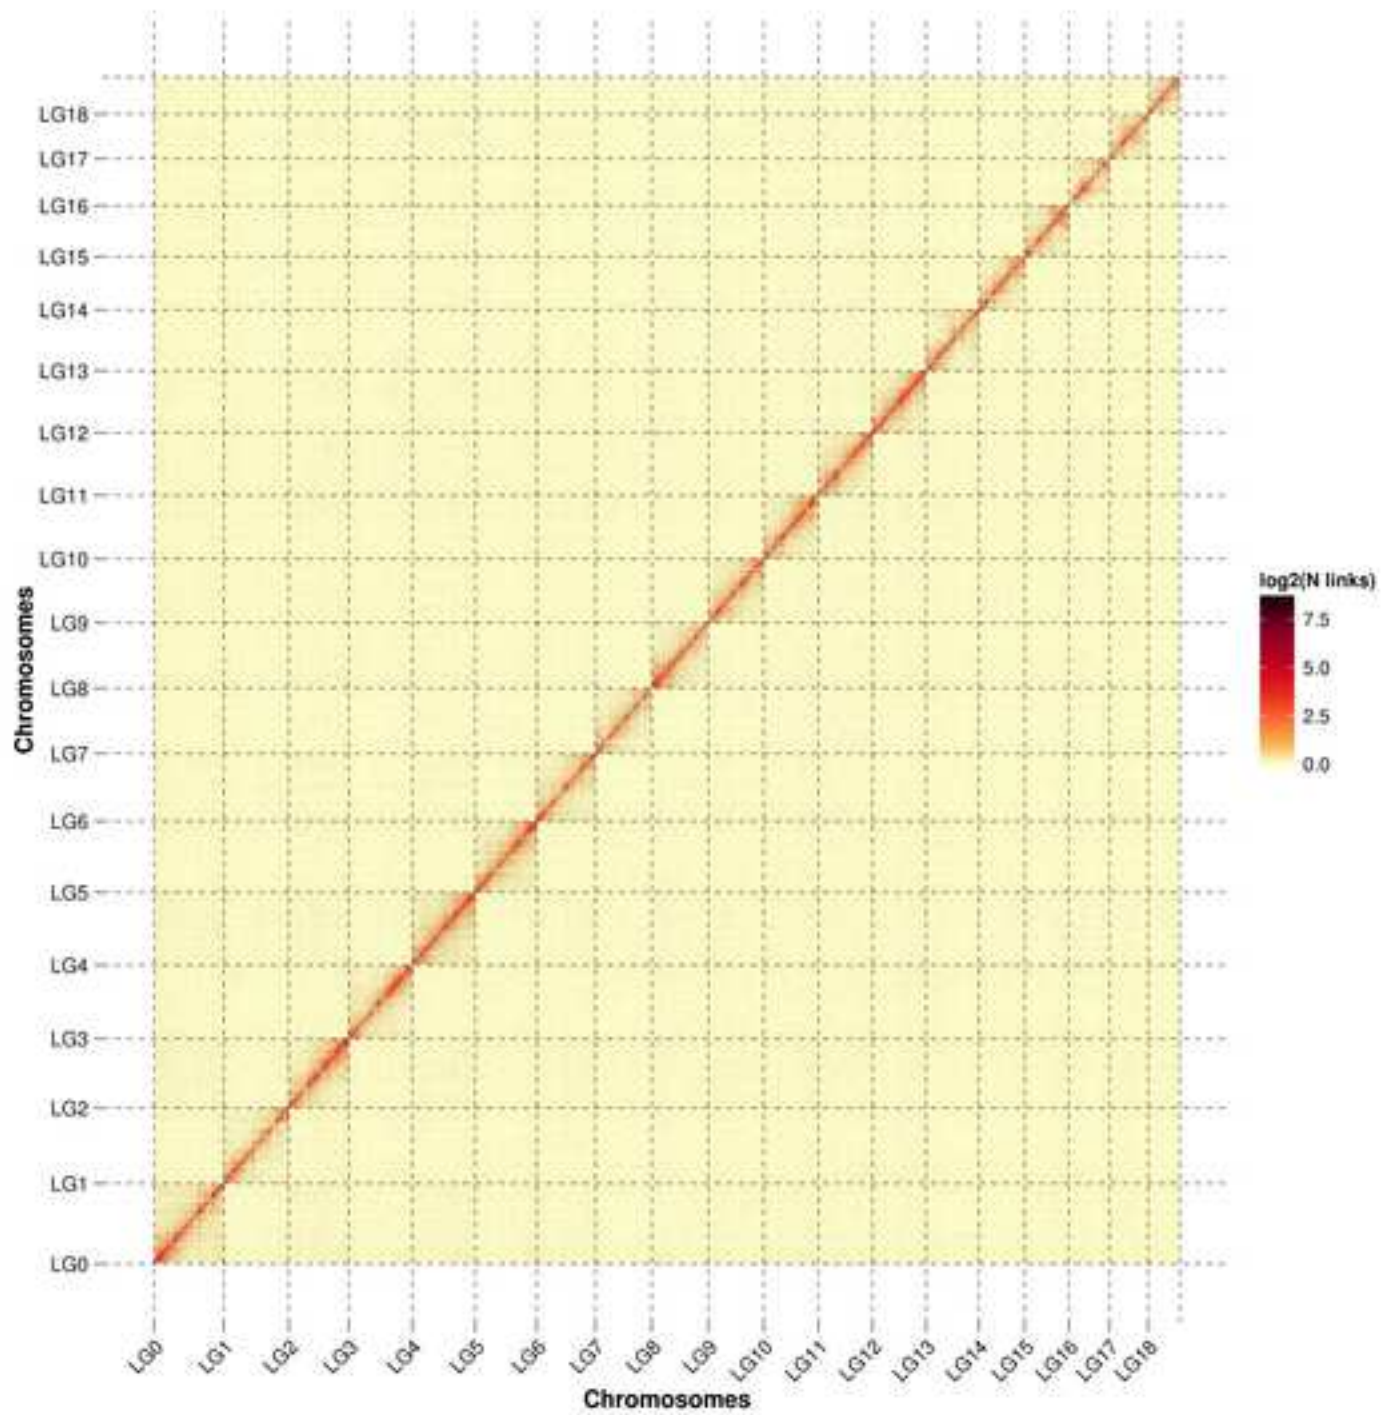



Figure 3

[Click here to access/download;Figure;Figure2](#)

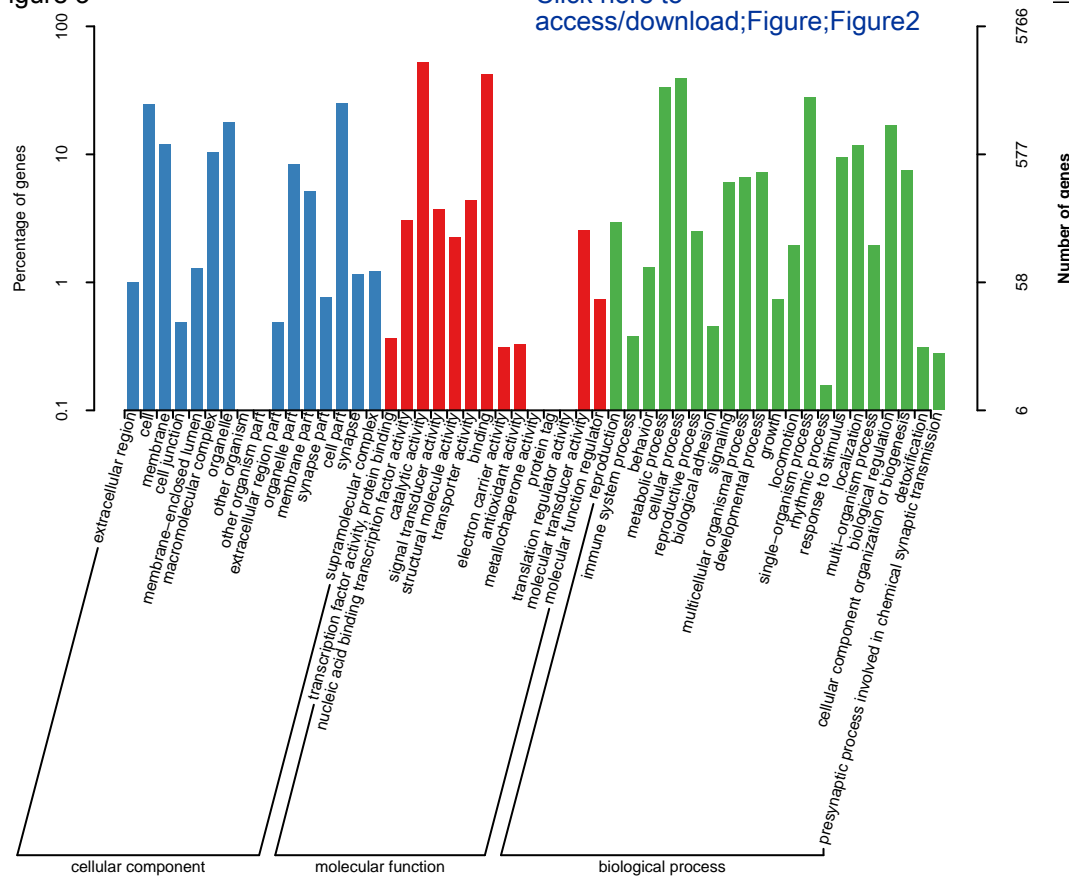

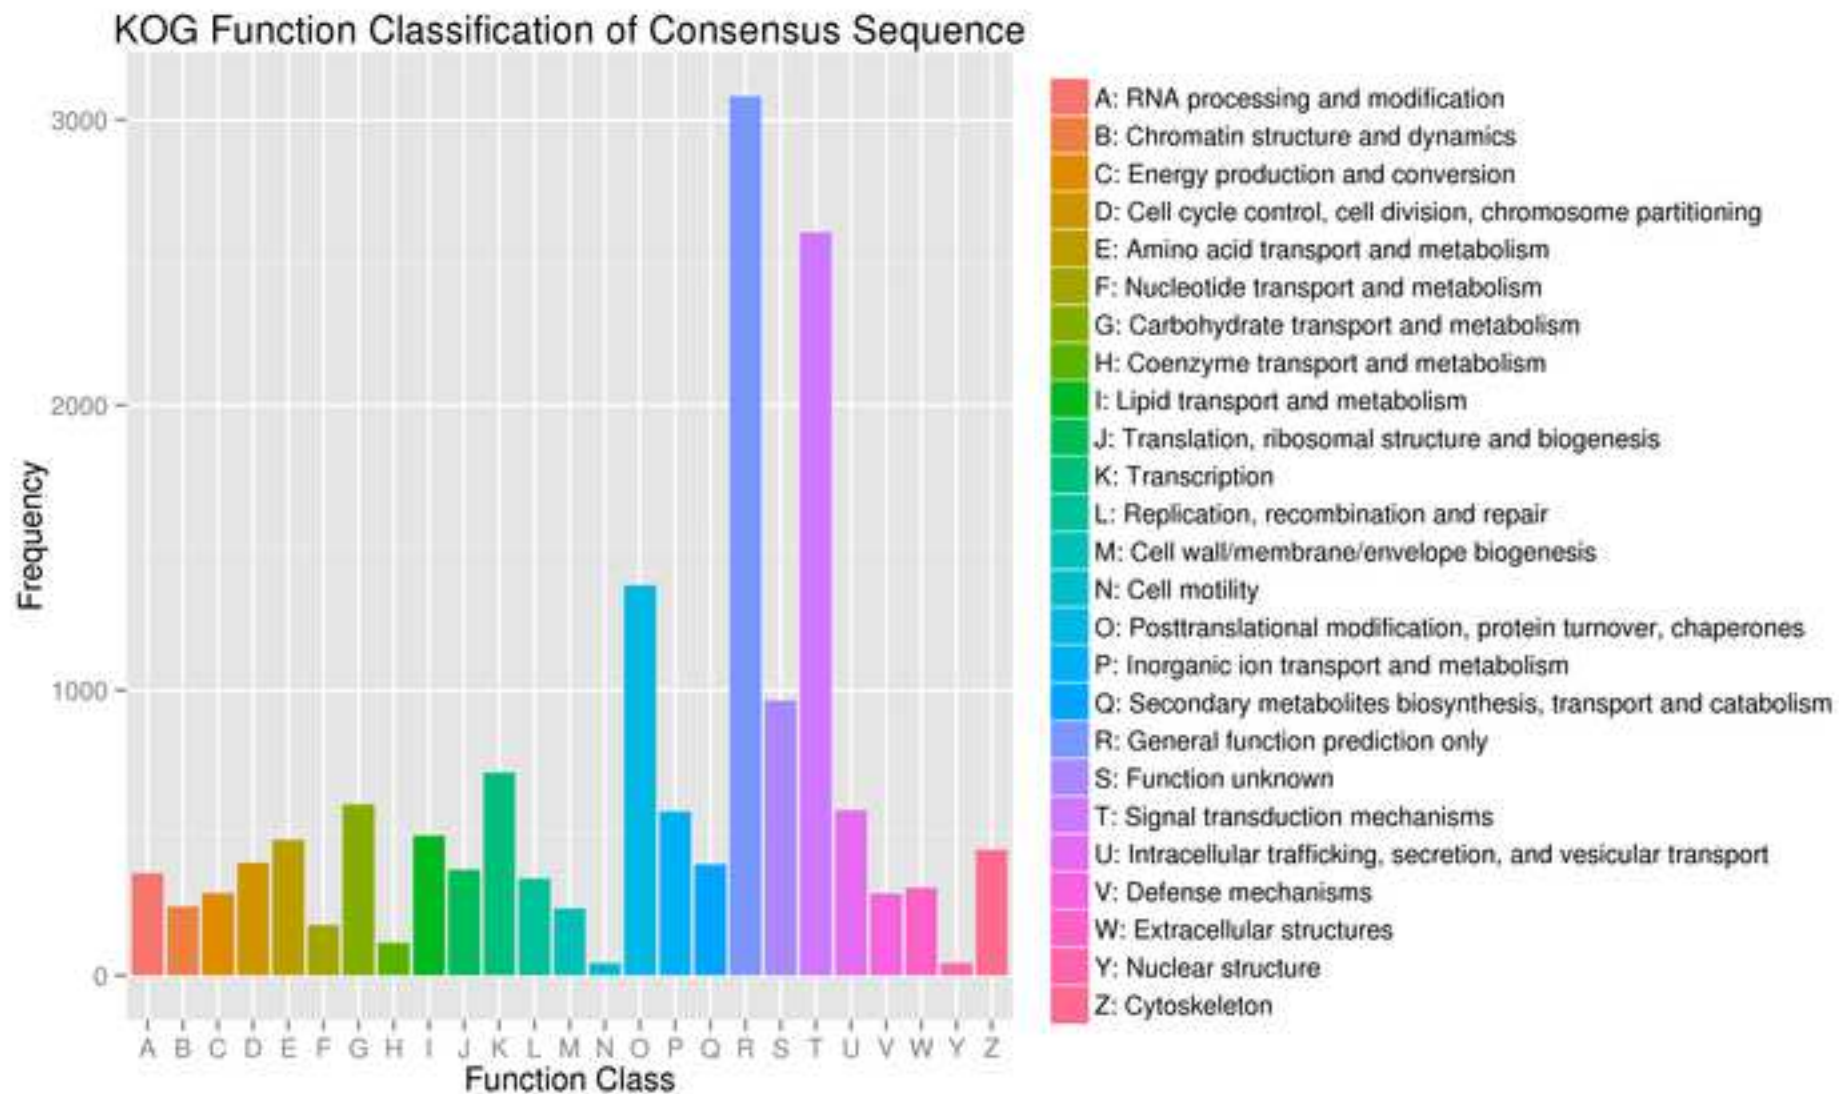



Click here to access/download  
**Supplementary Material**  
Supplementary Table1.xlsx





Click here to access/download  
**Supplementary Material**  
Supplementary material.docx



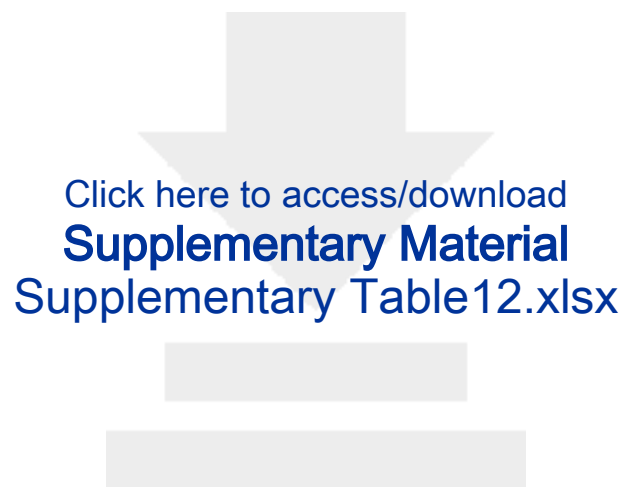

2019, Apr 21<sup>th</sup>

Dear GigaScience Editor,

We thank you and the two reviewers for the revision of our manuscript. We have read your requests/suggestions and those performed by the reviewers and each of these points have been revised carefully. We have added a figure (Figure 1) to show the shape and color of blood clam's shell and visceral mass. We have prepared a new supplementary table (the new Supplementary table 1) to present the key protocols, that were also uploaded to [protocols.io](https://protocols.io) as suggested by you. except that of Hi-C library preparation, We have provided more details of the key steps of Hi-C library construction at Lines 111-120. However, we do not include the very detailed Hi-C library protocol in Supplementary table 1, since it is a business secret of the BioMarker company, and they are still reluctant to provide us these parameters.

Here, we provide a point-by-point response to each reviewer's comments.

Sincerely,

Chong-Ming Wang

Yellow Sea Fisheries Research Institute (YSFRI)

E-mial: wangcm@ysfri.ac.cn

## Reviewer #1

### General comments:

Functional annotation was fairly extensive through the BLASTing of protein sequences to multiple databases. A statement should be added about the nr annotation as the nr database is not manually curated and is known to have errors that can be propogated. "Functional annotations that are found only in the nr database should not be used to annotate new genomes."

Following reviewer's comments, we have found and removed from the annotation table 41 genes annotated only in the Nr database. Now, we presented a final set of 22, 267 annotated genes.

The supplemental table with the blast annotations only contain the functional annotation without information about the blast score, length of alignment etc. It would be of great value to this data note if this information was added.

Following reviewer's comments, we have added blast score, length of alignment et al. for blast annotations to Nr and Nt databases. The detailed information regarding the functional annotations to

each database has been submitted to the GigaScience database (<ftp://user95@parrot.genomics.cn>) and it can be accessed by the reviewers using our credentials (user: user95 and password: WangCMClam). We prefer to not include all these details to the annotation supplemental table, since it will become difficult to read because of its large size.

### **Specific comments:**

1) If available please state the number of places where Hi-C broke contigs in the assembly.

There are 343 broke points during the Hi-C scaffolding process, detailed information has been uploaded to GigaScience database (<ftp://user95@parrot.genomics.cn>). We have stated this point at Line 136 in the main text.

2) For all programs used please state the version and all parameters required to replicate your analysis. We have provided the versions and parameters of all programs used in the manuscript at [protocols.io](http://protocols.io) and in the new Supplementary Table 1.

3) For all databases used (Kegg, nr KOG etc) please state the version or date of download used in annotation.

We have provided the version or date of download of all databases used in the manuscript at [protocols.io](http://protocols.io) and in the new Supplementary Table 1.

4) For the Blast analysis please specify if you used max-target-seq in your BLAST analysis and if you took the Best Blast Hit. How did you decide which Annotation to use?

Yes, we used the max-target-seq in our BLAST analysis with the parameter: `-max_target_seqs 100` (we have specified this point at [protocols.io](http://protocols.io) and in the new Supplementary Table 1.). For the final annotation we have selected the annotation with the highest score

5) Please specify which Illumina reads were used during Pilon polishing.

The illumina reads for genome survey was used during Pilon polishing. We have stated this point at Line 98.

6) Would prefer that the authors include the blast result for each annotation provided in the supplemental table 11.

Please see the general comments.

Line 51: The word knew should be know. "Compared to oysters and scallops, we still know very little ..."

The section containing "knew" have been revised as a whole.

### **Reviewer #2**

#### **Major points:**

The English of the manuscript is poor. In most places where there are issues, it is just awkward but in

some places the meaning is not clear.

We have invited a native speaker to kindly revise the language of the manuscript thoroughly. He fixed several language pitfalls and now we hope that the overall language quality is acceptable.

Was the DNA / material used all from the same individual?

We used haemocytetes collected from several specimens for DNA extraction, to obtain enough DNA for the different libraries we constructed. We have specified this point in the main text at line 60.

How were the reads filtered (line 91)?

We used a custom perl script to filter the reads shorter than 500 bp. We have stated this point at Lines 93-94.

How many cycles of Pilon were used?

We used three cycles, we have stated this at lines 97-98.

What were the BUSCO results of the merged assembly before removal of redundancy with Numer?

Were other tools such as Redundans explored for redundancy reduction?

We reduced the redundancy under the premise of keeping the integrity of the data. The evaluations of the different intermediate datasets were not included, while we displayed the best result. We did not use Redundans or other tools for redundancy reduction, since we were satisfied with the performance of Numer.

Methods used for Hi-C library preparation are inadequate.

We have provided more detailed information about the Hi-C library preparation at lines 111-120. We were not allowed to include some parameters because the protocol is a business secret of the BioMarker company, and they are reluctant to provide us these data.

The procedure described on lines 124-125 is not well explained. Why was this performed?

We have revised this section to provide more details and reasonability about Hi-C assembly at Lines 133-136.

Line 157: "the results of the three approaches" - unclear which three steps are referred to.

This refers to 'ab initio prediction, homology-based prediction, and transcriptome-based prediction', We have revised this point at Line 168 to make it more clear.

Lines 160-161: The procedure to detect pseudogenes is not adequately described.

We have revised this section at Lines 171-177.

Availability of Data and Materials - what about the predicted transcripts and protein sequences?

This information has been uploaded to GigaScience database (<ftp://user95@parrot.genomics.cn>) and can be accessed by the reviewers using our credentials (see answer to Rew1), whereas they will immediately be released after manuscript acceptance.

Minor points:

Line 38: To my knowledge, "ark shell" is a common name used for the entire family Arcidae, not just



this species.

We agree with you that "ark shell" is a common name used for the family Arcidae. The *Scapharca (Anadara) broughtonii* is always called 'blood clam' or 'bloody clam' in publications and Asia countries where the species is mainly distributed. So, we have revised this point indicating that 'blood clam' is a species of 'ark shell' (Lines 41-42).

Line 40: Correct "lived" to "lives"

We have replaced "lived" with "lives" at line 43.

Line 43: Correct "mollusk" to "molluscs"

We have replaced "mollusk" with "molluscs" at line 46.

Line 61: Correct "libraries" to "library"

We have replaced " libraries " with "library" at line 66.
